# Supplementary material for: Alterations of the Gut Microbiome Associated to Methane Metabolism in Mexican Children with Obesity
Source: MDPI journal article supplement (doi:10.3390/children9020148), 2022-01-24
Supplement: s1 [file s1]

SUPPLEMENTAL FIGURE AND TABLES

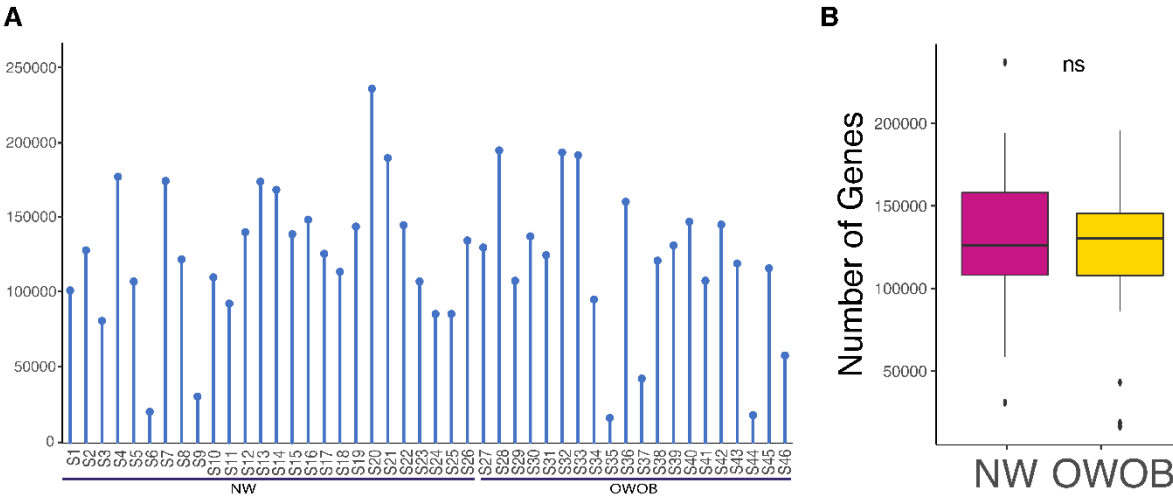

**Figure S1:** Number of genes predicted for each library **(A)** and pairwise comparison of number of genes predicted in NW vs OWOB **(B)**.

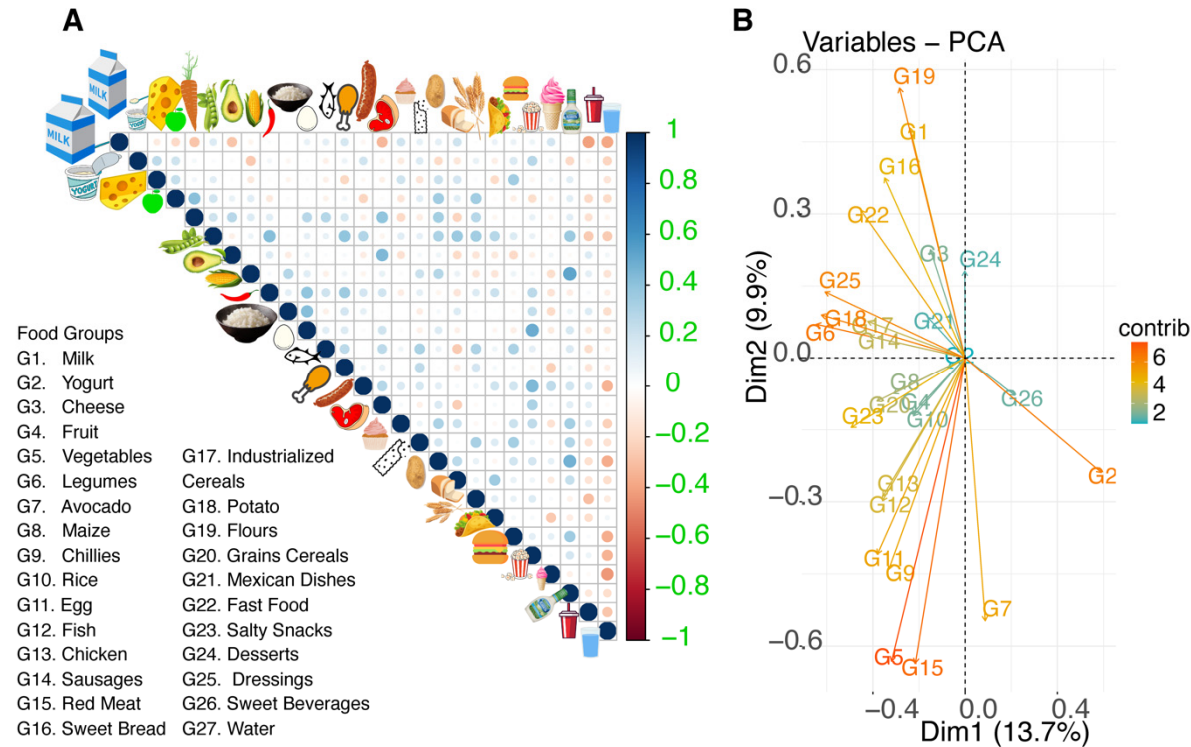

**Figure S2:** Correlation matrix between food groups that indicates relation between variables (**A**) and Principal Component Analysis (PCA) biplot of the 27 food group vectors where the principal component (PC) 1 explains 13.7% of total variance and PC2 explains 9.9% (**B**).

**Table S1:** Each of the 107 food items contained in the 11 sections surveyed in the FFQ.

| Original FFQ sections |        | Redefined food groups |    | Food items                                                                  |
|-----------------------|--------|-----------------------|----|-----------------------------------------------------------------------------|
| 1                     | Dairy  | G1-Milk               | 1  | whole milk (200 ml)                                                         |
| 1                     | Dairy  | G1-Milk               | 2  | skim or light milk (200 ml)                                                 |
| 1                     | Dairy  | G24-Desserts          | 3  | chocolate milk (200 ml)                                                     |
| 1                     | Dairy  | G3-Cheese             | 4  | Oaxaca type cheese (slice)                                                  |
| 1                     | Dairy  | G3-Cheese             | 5  | Manchego type cheese (slice)                                                |
| 1                     | Dairy  | G3-Cheese             | 6  | Cream cheese (15 ml)                                                        |
| 1                     | Dairy  | G3-Cheese             | 7  | American cheese (slice)                                                     |
| 1                     | Dairy  | G2-Yogurt             | 8  | Yogurth (250 ml)                                                            |
| 1                     | Dairy  | G24-Desserts          | 9  | Petit Suisse (Danonino or Petizoo, 84 gr)                                   |
| 1                     | Dairy  | G2-Yogurt             | 10 | Yakult, Chamyto or Lalacult (fermented milk, 80 ml)                         |
| 1                     | Dairy  | G2-Yogurt             | 11 | Activia Flora, Actimel or Svelty Gastro Protect (Probiotic yogurth, 255 ml) |
| 1                     | Dairy  | G24-Desserts          | 12 | Ice cream or sorbet (100 gr)                                                |
| 2                     | Fruits | G4-Fruit              | 13 | Banana                                                                      |
| 2                     | Fruits | G4-Fruit              | 14 | Orange                                                                      |
| 2                     | Fruits | G4-Fruit              | 15 | Orange juice (200 ml)                                                       |
| 2                     | Fruits | G4-Fruit              | 16 | Melon (slice)                                                               |
| 2                     | Fruits | G4-Fruit              | 17 | Watermelon (slice)                                                          |
| 2                     | Fruits | G4-Fruit              | 18 | Pineapple (slice)                                                           |
| 2                     | Fruits | G4-Fruit              | 19 | Papaya (slice)                                                              |
| 2                     | Fruits | G4-Fruit              | 20 | Peach                                                                       |
| 2                     | Fruits | G4-Fruit              | 21 | Apple                                                                       |
| 2                     | Fruits | G4-Fruit              | 22 | Pear                                                                        |
| 2                     | Fruits | G4-Fruit              | 23 | Mango                                                                       |
| 2                     | Fruits | G4-Fruit              | 24 | Tangerine                                                                   |
| 2                     | Fruits | G4-Fruit              | 25 | Strawberries (1/2 cup)                                                      |

|   |                           |               |    |                             |
|---|---------------------------|---------------|----|-----------------------------|
| 2 | Fruits                    | G4-Fruit      | 26 | Grapes (1/2 cup)            |
| 2 | Fruits                    | G4-Fruit      | 27 | Plum (3)                    |
| 3 | Vegetables                | G5-Vegetables | 28 | Tomato                      |
| 3 | Vegetables                | G18-Potato    | 29 | Potato                      |
| 3 | Vegetables                | G5-Vegetables | 30 | Jicama                      |
| 3 | Vegetables                | G5-Vegetables | 31 | Cucumber                    |
| 3 | Vegetables                | G5-Vegetables | 32 | Carrot                      |
| 3 | Vegetables                | G5-Vegetables | 33 | Lettuce (a leaf)            |
| 3 | Vegetables                | G5-Vegetables | 34 | zucchini or squash (1 cup)  |
| 3 | Vegetables                | G5-Vegetables | 35 | Nopal                       |
| 3 | Vegetables                | G7-Avocado    | 36 | Avocado (1/2)               |
| 3 | Vegetables                | G5-Vegetables | 37 | Broccoli (1 cup)            |
| 3 | Vegetables                | G9-Chillies   | 38 | hot sauce (15 ml) or chlies |
| 3 | Vegetables                | G9-Chillies   | 39 | Canned chilies              |
| 3 | Vegetables                | G8-Maize      | 40 | Corn                        |
| 4 | Legumes                   | G6-Legumes    | 41 | Beans (200 gr)              |
| 4 | Legumes                   | G6-Legumes    | 42 | Peas (1/2 cup)              |
| 4 | Legumes                   | G6-Legumes    | 43 | lentils (200 gr)            |
| 5 | Eggs, meats, and sausages | G11-Egg       | 44 | Egg                         |
| 5 | Eggs, meats, and sausages | G14-Sausages  | 45 | ham turkey or pork (slice)  |
| 5 | Eggs, meats, and sausages | G13-Chicken   | 46 | Chicken (1 piece)           |
| 5 | Eggs, meats, and sausages | G15-RedMeat   | 47 | Beef (125 gr)               |
| 5 | Eggs, meats, and sausages | G15-RedMeat   | 48 | Pork (125 gr)               |
| 5 | Eggs, meats, and sausages | G12-Fish      | 49 | Canned tuna (70 gr)         |
| 5 | Eggs, meats, and sausages | G15-RedMeat   | 50 | Pork rind                   |
| 5 | Eggs, meats, and sausages | G14-Sausages  | 51 | Sausage (turkey or pork)    |
| 5 | Eggs, meats, and sausages | G15-RedMeat   | 52 | Bacon (slice)               |

|   |                           |                   |    |                                     |
|---|---------------------------|-------------------|----|-------------------------------------|
| 5 | Eggs, meats, and sausages | G13-Chicken       | 53 | Liver (1 piece)                     |
| 5 | Eggs, meats, and sausages | G14-Sausages      | 54 | Chorizo (1 piece)                   |
| 5 | Eggs, meats, and sausages | G12-Fish          | 55 | Fish steak                          |
| 5 | Eggs, meats, and sausages | G12-Fish          | 56 | Canned sardines                     |
| 6 | Mexican and typical dises | G21-MexicanDishes | 57 | Pork taco                           |
| 6 | Mexican and typical dises | G15-RedMeat       | 58 | Barbacoa taco (sheep or lamb)       |
| 6 | Mexican and typical dises | G21-MexicanDishes | 59 | Pastor taco (pork)                  |
| 6 | Mexican and typical dises | G21-MexicanDishes | 60 | Quesadilla, sope or gordita grilled |
| 6 | Mexican and typical dises | G21-MexicanDishes | 61 | Quesadilla, sope or gordita fried   |
| 6 | Mexican and typical dises | G22-FastFood      | 62 | French fries (1 portion)            |
| 6 | Mexican and typical dises | G22-FastFood      | 63 | Hamburger                           |
| 6 | Mexican and typical dises | G22-FastFood      | 64 | Hot dog                             |
| 6 | Mexican and typical dises | G22-FastFood      | 65 | Sandwich                            |
| 6 | Mexican and typical dises | G21-MexicanDishes | 66 | Torta                               |
| 6 | Mexican and typical dises | G22-FastFood      | 67 | Pizza (slice)                       |
| 6 | Mexican and typical dises | G22-FastFood      | 68 | Nuggets (3)                         |
| 6 | Mexican and typical dises | G21-MexicanDishes | 69 | Tamal                               |
| 6 | Mexican and typical dises | G21-MexicanDishes | 70 | Pozole (1 portion)                  |
| 7 | Cereals                   | G8-Maize          | 71 | Maize tortilla                      |
| 7 | Cereals                   | G19-Flours        | 72 | Flour tortilla (wheat)              |
| 7 | Cereals                   | G19-Flours        | 73 | White bread (slice)                 |
| 7 | Cereals                   | G20-GrainsCereals | 74 | Wholemeal bread (slice)             |
| 7 | Cereals                   | G19-Flours        | 75 | Bolillo or telera                   |
| 7 | Cereals                   | G16-SweetBread    | 76 | Sweet bread                         |
| 7 | Cereals                   | G10-Rice          | 77 | Rice (1 portion)                    |
| 7 | Cereals                   | G19-Flours        | 78 | Soup (1 portion)                    |
| 7 | Cereals                   | G19-Flours        | 79 | Pasta (1 portion)                   |

|    |                     |                    |     |                                      |
|----|---------------------|--------------------|-----|--------------------------------------|
| 7  | Cereals             | G20-GrainsCereals  | 80  | Oatmeal (1 cup)                      |
| 7  | Cereals             | G17-IndCereal      | 81  | Cereal without sugar (1 portion)     |
| 7  | Cereals             | G17-IndCereal      | 82  | Cereal with sugar (1 portion)        |
| 7  | Cereals             | G20-GrainsCereals  | 83  | Cereal with fiber (1 portion)        |
| 7  | Cereals             | G16-SweetBread     | 84  | hot cake (1 piece)                   |
| 7  | Cereals             | G23-SaltySnacks    | 85  | Saltines (1 personal package)        |
| 8  | Beverages           | G26-SweetBeverages | 86  | Cola soda (355 ml)                   |
| 8  | Beverages           | G26-SweetBeverages | 87  | Soda (355 ml)                        |
| 8  | Beverages           | G27-Water          | 88  | Natural water (200 ml)               |
| 8  | Beverages           | G26-SweetBeverages | 89  | Water with natural fruit (200 ml)    |
| 8  | Beverages           | G26-SweetBeverages | 90  | Water with sweeteners (200 ml)       |
| 8  | Beverages           | G24-Desserts       | 91  | Milkshake (200 ml)                   |
| 8  | Beverages           | G26-SweetBeverages | 92  | Industrialized fruit juice (250 ml)  |
| 8  | Beverages           | G26-SweetBeverages | 93  | Sports drink (250 ml)                |
| 9  | Sweets and desserts | G16-SweetBread     | 94  | Cake (slice)                         |
| 9  | Sweets and desserts | G24-Desserts       | 95  | Jam and condensed milk candy (15 ml) |
| 9  | Sweets and desserts | G24-Desserts       | 96  | chocolate bar                        |
| 9  | Sweets and desserts | G23-SaltySnacks    | 97  | Peanuts (1 portion)                  |
| 9  | Sweets and desserts | G23-SaltySnacks    | 98  | Fried snacks (1 portion)             |
| 9  | Sweets and desserts | G16-SweetBread     | 99  | cupcake with creamy filling          |
| 9  | Sweets and desserts | G16-SweetBread     | 100 | Cookies                              |
| 9  | Sweets and desserts | G23-SaltySnacks    | 101 | Popcorn                              |
| 9  | Sweets and desserts | G24-Desserts       | 102 | Hot tamarind candy                   |
| 9  | Sweets and desserts | G17-IndCereal      | 103 | Cereal bar                           |
| 10 | Fats                | G25-Dressings      | 104 | Butter (15 ml)                       |
| 10 | Fats                | G25-Dressings      | 105 | Dressing (15 ml)                     |
| 10 | Fats                | G25-Dressings      | 106 | Mayonnaise (15 ml)                   |

|    |             |    |     |          |
|----|-------------|----|-----|----------|
| 11 | Supplements | NA | 107 | Vitamins |
|----|-------------|----|-----|----------|

**Table S2:** Z-scores transformed daily intake percentage table for each food group.

| SampleID | G1-Milk | G2-Yogurt | G3-Cheese | G4-Fruit | G5-Vegetables | G6-Legumes | G7-Avocado | G8-Maize | G9-Chillies | G10-Rice | G11-Egg | G12-Fish | G13-Chicken | Sausages<br>G14- | RedMeat<br>G15- | SweetBread<br>G16- | Indicereal<br>G17- | G18-Potato | G19-Flours | GrainsCereal<br>G20- | MexicanDish<br>G21- | FastFood<br>G22- | SaltySnacks<br>G23- | G24-Desserts | SweetBecera<br>G25-Dressings | G26-   | G27-Water |
|----------|---------|-----------|-----------|----------|---------------|------------|------------|----------|-------------|----------|---------|----------|-------------|------------------|-----------------|--------------------|--------------------|------------|------------|----------------------|---------------------|------------------|---------------------|--------------|------------------------------|--------|-----------|
| S117     | 0.309   | 0.900     | 0.193     | 0.436    | 0.813         | 0.549      | 0.487      | 1.313    | 0.940       | 0.163    | 0.234   | -0.401   | -0.067      | -0.342           | -1.285          | -0.175             | -0.243             | 0.501      | -0.756     | 0.134                | -0.913              | 0.679            | -0.013              | -0.708       | 0.323                        | 1.130  | -1.133    |
| S134     | -1.630  | -0.882    | -0.668    | 0.444    | 0.899         | -0.126     | -0.238     | 1.151    | 1.260       | 0.069    | 0.137   | -0.775   | -0.182      | -0.667           | -0.335          | -0.783             | -1.037             | 1.076      | 1.117      | 0.840                | -0.533              | 0.578            | -0.498              | -0.825       | -0.030                       | 0.867  | 0.725     |
| S179     | 0.272   | 0.192     | 0.244     | 0.428    | 1.517         | 0.980      | 0.712      | 0.516    | 0.699       | 0.075    | 0.010   | 1.242    | 0.356       | 0.768            | 0.965           | -0.335             | 0.312              | 0.334      | 0.364      | 0.147                | 0.710               | 1.242            | 0.153               | 0.332        | 0.879                        | 0.666  | 1.199     |
| S201     | -1.387  | -0.039    | 0.532     | 1.315    | 2.092         | 0.745      | 0.178      | -0.000   | -0.625      | -1.308   | 0.515   | 0.441    | 0.910       | 1.057            | -0.707          | -0.163             | 0.540              | 1.401      | 0.776      | 2.039                | -0.149              | 0.575            | 0.327               | 0.109        | 0.589                        | -0.961 | 0.526     |
| S329     | -0.015  | -0.229    | 0.055     | -0.539   | -0.979        | -0.163     | 2.723      | 0.495    | 0.931       | -0.043   | -0.853  | 0.296    | 0.317       | -0.425           | -0.700          | -0.444             | 0.388              | 0.669      | 0.031      | 0.634                | 0.815               | 0.952            | 0.338               | 0.354        | 0.099                        | 0.720  | 1.274     |
| S339     | 0.341   | 0.474     | 0.199     | -0.501   | -1.098        | -1.112     | 3.326      | 0.647    | -0.651      | -1.067   | -0.782  | 1.199    | -0.060      | -0.400           | -0.775          | -0.753             | 1.617              | -0.609     | 0.236      | -0.731               | -0.453              | -0.091           | 0.362               | 0.544        | 0.180                        | -1.166 | 0.903     |
| S402     | 0.480   | -0.041    | 1.408     | 1.790    | 1.345         | 1.239      | -0.876     | 0.398    | -0.593      | 2.366    | 0.346   | -0.686   | -0.065      | -0.529           | -0.174          | -0.929             | -1.277             | 0.622      | 2.014      | 1.473                | 0.337               | -1.212           | 0.633               | 0.538        | 0.095                        | 1.360  | -0.158    |
| S573     | -0.260  | 0.561     | -0.774    | -0.955   | -0.301        | -0.485     | -0.876     | -1.037   | -0.066      | 1.464    | -0.812  | 0.831    | -0.758      | 1.516            | -0.277          | -0.214             | 1.254              | -0.642     | 1.245      | 1.096                | 2.155               | 2.735            | -0.109              | -0.538       | -0.879                       | 0.802  | -0.621    |
| S578     | 0.342   | -0.503    | -0.761    | -0.193   | 1.241         | 3.539      | 0.852      | 0.264    | 4.358       | -0.701   | -0.029  | 1.735    | 2.677       | 1.416            | 1.491           | -0.271             | 1.447              | -0.467     | -0.843     | 2.050                | 2.425               | -0.583           | -0.354              | 0.446        | 0.130                        | 0.365  | 0.553     |
| S847     | 0.241   | 0.818     | -0.632    | 0.224    | -0.631        | 1.424      | 0.769      | 0.596    | 0.547       | 1.954    | 0.546   | 0.253    | 3.162       | -0.484           | -1.471          | -0.203             | 1.423              | 0.842      | 0.367      | 0.230                | 0.248               | 0.146            | -0.196              | -0.506       | 0.190                        | 0.661  | -1.013    |
| S865     | 0.954   | -0.523    | -0.664    | 1.251    | -0.777        | 1.008      | 0.867      | -0.101   | -0.699      | 0.574    | 0.655   | 0.165    | 0.432       | -0.817           | -0.480          | -0.503             | -0.846             | -0.461     | 2.331      | -0.879               | 2.402               | -0.921           | -0.450              | -0.789       | 1.252                        | -1.329 | 0.139     |
| S884     | 0.912   | -0.741    | -0.875    | 1.339    | 0.643         | 1.151      | -0.017     | -0.353   | -0.487      | 0.704    | 0.965   | -0.145   | -1.120      | 0.386            | -0.013          | -0.597             | -0.378             | 2.669      | 1.717      | 0.396                | 1.923               | -0.978           | 0.439               | 0.139        | -0.719                       | -0.398 | -1.135    |



|     |     |     |     |     |     |     |     |     |     |     |     |     |     |     |     |     |     |     |     |     |     |     |     |     |     |     |     |
|-----|-----|-----|-----|-----|-----|-----|-----|-----|-----|-----|-----|-----|-----|-----|-----|-----|-----|-----|-----|-----|-----|-----|-----|-----|-----|-----|-----|
| S15 | 0.6 | -   | 0.4 | -   | -   | -   | -   | -   | -   | -   | -   | -   | -   | 0.0 | -   | -   | 0.4 | -   | 0.0 | 1.5 | -   | 1.0 | 0.0 | 2.9 | -   | 0.5 | -   |
| 31  | 36  | 0.4 | 65  | 1.3 | 1.3 | 0.6 | 0.8 | 1.0 | 0.6 | 0.7 | 0.7 | 0.2 | 0.5 | 01  | 0.6 | 0.8 | 75  | 0.8 | 58  | 26  | 0.6 | 11  | 74  | 23  | 0.8 | 85  | 1.0 |
|     |     | 97  |     | 18  | 32  | 25  | 76  | 48  | 99  | 61  | 14  | 82  | 26  |     | 84  | 37  |     | 41  |     | 99  |     |     |     |     | 79  |     | 51  |
| S17 | 2.6 | -   | -   | -   | -   | 0.5 | -   | -   | -   | -   | -   | -   | 0.4 | -   | -   | -   | 0.1 | -   | 0.7 | -   | -   | -   | 0.6 | -   | -   | -   | -   |
| 08  | 04  | 0.6 | 0.3 | 0.4 | 0.2 | 90  | 0.8 | 0.4 | 0.0 | 0.3 | 0.2 | 0.7 | 65  | 0.5 | 1.3 | 0.7 | 45  | 0.0 | 24  | 0.8 | 0.1 | 0.4 | 0.3 | 15  | 0.7 | 0.0 | 1.2 |
|     |     | 89  | 67  | 37  | 83  |     | 76  | 86  | 29  | 53  | 96  | 63  |     | 75  | 08  | 05  |     | 78  |     | 79  | 13  | 77  | 08  |     | 95  | 94  | 16  |
| S19 | -   | -   | -   | 0.0 | -   | 0.0 | -   | -   | -   | 0.1 | -   | -   | 0.1 | -   | 0.7 | -   | 0.5 | -   | 1.2 | -   | 0.9 | 0.2 | -   | -   | 0.8 | -   | 1.6 |
| 14  | 1.1 | 0.1 | 1.0 | 42  | 0.6 | 07  | 0.2 | 0.6 | 0.4 | 29  | 0.7 | 0.5 | 75  | 0.6 | 25  | 0.3 | 78  | 0.6 | 37  | 0.6 | 90  | 91  | 0.1 | 0.8 | 92  | 0.8 | 79  |
|     | 00  | 49  | 34  |     | 89  |     | 10  | 35  | 38  |     | 95  | 74  |     | 36  |     | 80  |     | 23  |     | 01  |     | 83  | 35  |     | 34  |     |     |
| S19 | -   | -   | 3.3 | -   | -   | 2.7 | -   | 0.3 | -   | -   | -   | -   | -   | 0.7 | -   | 3.5 | -   | 1.9 | 2.5 | -   | -   | 2.4 | 0.1 | -   | 3.0 | 0.4 | -   |
| 22  | 0.2 | 0.5 | 61  | 0.3 | 0.4 | 57  | 0.5 | 32  | 0.5 | 1.1 | 0.3 | 0.7 | 0.7 | 83  | 0.2 | 40  | 0.8 | 51  | 07  | 0.8 | 1.0 | 40  | 09  | 0.6 | 86  | 07  | 0.6 |
|     | 64  | 01  |     | 88  | 08  |     | 10  |     | 56  | 79  | 51  | 90  | 60  |     | 55  |     | 70  |     |     | 79  | 26  |     |     | 22  |     | 24  |     |
| S19 | -   | -   | -   | 1.2 | -   | -   | -   | 3.7 | -   | 1.5 | -   | 0.2 | -   | 0.6 | -   | 0.4 | 3.4 | 2.0 | -   | -   | -   | 1.3 | -   | 0.3 | 3.3 | 1.0 | -   |
| 69  | 0.1 | 1.1 | 0.3 | 10  | 0.6 | 0.4 | 0.8 | 13  | 0.6 | 70  | 0.3 | 41  | 0.7 | 70  | 0.5 | 80  | 29  | 76  | 0.1 | 0.8 | 0.8 | 93  | 0.0 | 82  | 29  | 41  | 1.7 |
|     | 94  | 29  | 81  |     | 08  | 56  | 76  |     | 99  |     | 14  |     | 16  |     | 84  |     |     |     | 59  | 79  | 32  |     | 65  |     |     | 12  |     |
| S19 | 0.1 | 2.8 | -   | -   | -   | 0.0 | -   | -   | 1.7 | 2.1 | 2.2 | -   | -   | 3.2 | 1.5 | 0.3 | -   | 0.1 | -   | -   | 0.0 | -   | 5.6 | 0.2 | -   | 0.8 | -   |
| 72  | 63  | 83  | 0.2 | 0.9 | 0.2 | 82  | 0.8 | 0.5 | 84  | 38  | 60  | 0.6 | 0.4 | 61  | 97  | 26  | 0.4 | 09  | 0.1 | 0.0 | 97  | 0.3 | 67  | 35  | 0.1 | 16  | 1.7 |
|     |     |     | 11  | 80  | 54  |     | 76  | 53  |     |     |     | 79  | 91  |     |     |     | 88  |     | 12  | 93  |     | 70  |     | 87  |     | 12  |     |
| S21 | -   | -   | -   | -   | -   | 0.5 | 1.0 | -   | 1.6 | -   | 0.8 | -   | -   | -   | -   | -   | 0.1 | -   | 0.8 | 0.8 | 1.0 | -   | 0.3 | -   | -   | -   | 1.9 |
| 46  | 0.9 | 1.1 | 0.4 | 0.7 | 0.1 | 40  | 50  | 0.0 | 17  | 0.6 | 58  | 0.7 | 1.0 | 0.8 | 0.5 | 0.8 | 85  | 0.3 | 36  | 37  | 28  | 0.7 | 75  | 0.5 | 0.4 | 0.8 | 69  |
|     | 70  | 91  | 90  | 22  | 66  |     | 48  |     | 31  |     | 31  | 98  | 32  | 50  | 82  | 73  |     | 89  |     |     |     | 37  |     | 56  | 02  | 29  |     |
| S21 | -   | 0.3 | 2.7 | 2.6 | 0.0 | 0.3 | -   | -   | 0.5 | 0.4 | 0.5 | 0.1 | -   | -   | -   | -   | 0.3 | 0.8 | 0.5 | 1.8 | -   | 1.1 | -   | 1.2 | -   | -   | -   |
| 48  | 0.8 | 37  | 60  | 51  | 79  | 05  | 0.0 | 0.0 | 46  | 67  | 46  | 74  | 1.1 | 0.5 | 0.0 | 0.7 | 43  | 41  | 01  | 89  | 0.7 | 47  | 0.0 | 98  | 0.2 | 0.4 | 1.0 |
|     | 87  |     |     |     |     |     | 54  | 58  |     |     |     |     | 52  | 17  | 45  | 26  |     |     |     | 27  |     | 14  |     | 94  | 73  | 14  |     |
| S22 | 1.3 | -   | -   | -   | 1.9 | 0.0 | 0.1 | -   | -   | -   | 0.9 | 4.2 | 0.7 | -   | 1.6 | 1.8 | 1.5 | 1.2 | -   | 2.1 | -   | 2.1 | 2.0 | -   | 2.2 | -   | -   |
| 13  | 31  | 0.3 | 0.7 | 0.3 | 66  | 79  | 07  | 0.0 | 0.6 | 0.9 | 01  | 91  | 23  | 0.6 | 49  | 09  | 33  | 29  | 1.2 | 60  | 0.4 | 44  | 01  | 0.3 | 23  | 1.1 | 0.8 |
|     |     | 79  | 12  | 79  |     |     |     | 25  | 30  | 62  |     |     |     | 27  |     |     |     |     | 88  |     | 97  |     | 43  |     | 14  | 77  |     |
| S22 | -   | -   | -   | -   | 1.7 | 0.5 | 1.2 | 1.8 | 1.0 | 2.8 | 4.1 | 0.8 | 0.9 | 0.1 | 1.6 | -   | -   | -   | -   | -   | -   | -   | 1.4 | -   | 1.4 | -   | 0.5 |
| 16  | 0.5 | 0.8 | 0.4 | 0.7 | 75  | 26  | 35  | 52  | 53  | 79  | 62  | 63  | 15  | 29  | 37  | 0.2 | 0.5 | 0.3 | 0.5 | 0.0 | 0.6 | 0.6 | 38  | 0.6 | 41  | 0.5 | 30  |
|     | 70  | 10  | 54  | 96  |     |     |     |     |     |     |     |     |     |     |     | 48  | 82  | 16  | 16  | 98  | 74  | 19  |     | 18  |     | 80  |     |
| S22 | 2.2 | -   | -   | -   | -   | -   | 1.5 | -   | 1.1 | -   | 1.3 | 0.3 | 1.3 | -   | -   | 0.1 | 0.5 | -   | -   | -   | -   | -   | -   | -   | -   | -   | 0.8 |
| 21  | 47  | 1.0 | 0.9 | 0.8 | 0.4 | 0.4 | 38  | 0.5 | 29  | 0.4 | 98  | 79  | 11  | 0.6 | 1.2 | 10  | 55  | 0.1 | 0.2 | 0.4 | 0.7 | 0.8 | 0.4 | 0.7 | 0.8 | 1.4 | 51  |
|     |     | 90  | 97  | 15  | 70  | 30  |     | 65  |     | 59  |     |     |     | 06  | 01  |     |     | 97  | 23  | 72  | 29  | 34  | 83  | 87  | 79  | 85  |     |
| S22 | 0.3 | 0.5 | 0.2 | 0.1 | 1.4 | -   | 0.5 | -   | -   | 0.2 | 0.2 | 0.7 | -   | -   | 0.4 | 0.2 | -   | 0.5 | 0.0 | -   | -   | -   | -   | 2.4 | -   | -   | -   |
| 69  | 96  | 31  | 41  | 19  | 57  | 0.5 | 38  | 0.6 | 0.6 | 19  | 91  | 72  | 1.2 | 0.4 | 14  | 15  | 1.0 | 62  | 05  | 0.2 | 0.7 | 0.3 | 0.6 | 67  | 0.6 | 0.3 | 1.1 |
|     |     |     |     |     | 57  |     | 22  | 49  |     |     |     |     | 50  | 79  |     | 11  |     |     | 61  | 47  | 12  | 57  |     | 38  | 41  | 11  |     |
| S22 | -   | -   | 1.4 | -   | -   | -   | 0.1 | -   | 1.1 | 0.7 | 1.3 | 0.8 | 0.6 | -   | 0.5 | 1.6 | -   | 1.1 | 0.1 | -   | 0.2 | 0.7 | 0.4 | -   | -   | 2.2 | -   |
| 70  | 0.2 | 0.6 | 94  | 0.4 | 0.8 | 0.4 | 48  | 0.9 | 04  | 22  | 61  | 27  | 12  | 0.1 | 49  | 27  | 0.5 | 27  | 62  | 0.8 | 99  | 72  | 81  | 0.3 | 0.8 | 50  | 1.2 |
|     | 66  | 70  |     | 09  | 93  | 10  |     | 29  |     |     |     |     |     | 13  |     |     | 00  |     |     | 48  |     |     |     | 42  | 47  |     | 77  |
| S22 | -   | -   | -   | -   | 1.7 | -   | -   | 1.8 | -   | 1.1 | -   | -   | 1.1 | -   | 2.7 | -   | -   | 1.5 | -   | -   | -   | 0.8 | -   | -   | -   | -   | 0.6 |
| 89  | 0.4 | 0.8 | 0.0 | 0.4 | 86  | 0.8 | 0.5 | 57  | 0.6 | 38  | 0.4 | 0.2 | 18  | 0.6 | 37  | 1.0 | 1.1 | 92  | 0.4 | 0.7 | 0.0 | 73  | 0.3 | 0.6 | 0.6 | 0.4 | 94  |
|     | 65  | 85  | 01  | 95  |     | 91  | 52  |     | 99  |     | 58  | 74  |     | 79  |     | 42  | 31  |     | 55  | 41  | 44  |     | 78  | 62  | 33  | 50  |     |
| S23 | 0.9 | 0.5 | -   | -   | -   | 1.6 | -   | -   | -   | -   | -   | -   | 0.3 | 2.2 | 0.3 | -   | -   | -   | -   | -   | -   | 1.3 | -   | 3.3 | 0.2 | -   | -   |
| 45  | 02  | 60  | 1.0 | 1.1 | 0.6 | 87  | 0.8 | 0.5 | 0.6 | 1.0 | 0.6 | 0.5 | 92  | 79  | 86  | 0.3 | 1.2 | 0.4 | 0.2 | 0.8 | 0.3 | 02  | 0.1 | 70  | 61  | 0.4 | 1.3 |
|     |     |     | 21  | 73  | 75  |     | 76  | 00  | 39  | 07  | 58  | 10  |     |     |     | 09  | 17  | 73  | 64  | 79  | 56  |     | 46  |     | 35  | 99  |     |

|     |     |     |     |     |     |     |     |     |     |     |     |     |     |     |     |     |     |     |     |     |     |     |     |     |     |     |     |
|-----|-----|-----|-----|-----|-----|-----|-----|-----|-----|-----|-----|-----|-----|-----|-----|-----|-----|-----|-----|-----|-----|-----|-----|-----|-----|-----|-----|
| S24 | 0.5 | -   | -   | 0.7 | -   | 0.0 | -   | 0.3 | -   | -   | 0.9 | -   | -   | 1.1 | 1.2 | -   | 0.6 | 1.8 | 0.0 | 0.3 | 0.1 | -   | -   | 0.2 | 1.5 | -   | 0.3 |
| 29  | 68  | 1.0 | 0.9 | 63  | 0.0 | 64  | 0.8 | 61  | 0.6 | 0.1 | 21  | 0.9 | 0.4 | 78  | 50  | 1.0 | 28  | 88  | 38  | 93  | 02  | 0.5 | 0.3 | 88  | 10  | 1.4 | 51  |
|     |     | 78  | 51  |     | 08  |     | 76  |     | 99  | 42  |     | 05  | 38  |     |     | 04  |     |     |     |     |     | 59  | 81  |     |     | 22  |     |
| S24 | -   | -   | -   | -   | -   | -   | -   | -   | -   | -   | 0.0 | -   | -   | -   | -   | -   | -   | -   | -   | -   | -   | -   | -   | -   | -   | 1.9 | 1.3 |
| 52  | 1.1 | 0.9 | 0.8 | 1.2 | 0.9 | 0.3 | 0.2 | 0.4 | 0.6 | 0.0 | 47  | 0.6 | 0.2 | 0.5 | 1.0 | 0.4 | 0.9 | 0.9 | 0.7 | 0.7 | 1.0 | 1.0 | 0.7 | 0.7 | 0.7 | 36  | 31  |
|     | 92  | 88  | 36  | 86  | 06  | 24  | 79  | 85  | 32  | 19  |     | 43  | 88  | 50  | 69  | 87  | 82  | 12  | 62  | 54  | 70  | 62  | 20  | 22  | 13  |     |     |
| S24 | 0.6 | -   | -   | -   | 0.1 | -   | -   | -   | -   | 0.3 | -   | -   | 0.1 | -   | -   | 1.1 | -   | -   | -   | -   | -   | -   | -   | -   | 0.2 | 0.9 | -   |
| 68  | 42  | 0.5 | 0.3 | 0.4 | 23  | 0.8 | 0.6 | 0.2 | 0.6 | 75  | 0.9 | 0.2 | 90  | 0.6 | 0.6 | 50  | 1.0 | 0.8 | 0.3 | 0.7 | 0.9 | 0.9 | 0.5 | 0.6 | 07  | 88  | 0.0 |
|     |     | 98  | 38  | 06  |     | 85  | 53  | 67  | 99  |     | 94  | 80  |     | 53  | 47  |     | 30  | 40  | 79  | 10  | 95  | 85  | 04  | 49  |     |     | 57  |
| S25 | -   | 1.3 | -   | 0.9 | -   | 0.6 | -   | -   | -   | -   | -   | 0.0 | -   | -   | -   | 0.5 | 1.3 | -   | -   | 2.3 | 0.1 | -   | -   | -   | -   | -   | 0.9 |
| 27  | 0.2 | 26  | 0.2 | 63  | 0.4 | 92  | 0.8 | 0.4 | 0.5 | 0.2 | 0.9 | 24  | 0.5 | 0.2 | 0.3 | 92  | 12  | 1.0 | 0.3 | 49  | 35  | 0.3 | 0.2 | 0.7 | 0.8 | 1.1 | 02  |
|     | 63  |     | 60  |     | 01  |     | 76  | 87  | 73  | 01  | 05  |     | 09  | 57  | 64  |     |     |     | 90  | 45  |     | 23  | 86  | 71  | 79  | 73  |     |
| S25 | -   | -   | -   | 0.2 | -   | -   | 2.1 | 1.6 | -   | -   | -   | -   | -   | -   | -   | -   | -   | -   | -   | -   | -   | -   | -   | 0.0 | -   | 0.6 | 0.1 |
| 93  | 0.3 | 0.1 | 0.1 | 75  | 0.0 | 0.4 | 58  | 11  | 0.6 | 0.2 | 0.9 | 0.6 | 0.5 | 0.6 | 0.0 | 0.4 | 1.1 | 0.7 | 1.3 | 0.6 | 0.9 | 0.5 | 0.5 | 79  | 0.0 | 37  | 76  |
|     | 27  | 58  | 83  |     | 27  | 23  |     |     | 99  | 42  | 19  | 32  | 59  | 25  | 92  | 88  | 78  | 58  | 52  | 73  | 33  | 93  | 39  |     | 08  |     |     |
| S26 | -   | 2.4 | -   | 1.6 | 1.1 | 0.1 | -   | -   | -   | -   | -   | -   | 2.1 | -   | -   | -   | 1.2 | -   | -   | 0.6 | -   | 0.6 | -   | -   | -   | -   | 0.0 |
| 00  | 0.7 | 24  | 0.8 | 39  | 07  | 30  | 0.8 | 0.3 | 0.6 | 0.7 | 0.6 | 0.1 | 03  | 0.5 | 0.6 | 0.8 | 64  | 0.5 | 0.3 | 10  | 1.0 | 08  | 0.2 | 0.5 | 0.6 | 0.3 | 32  |
|     | 31  |     | 02  |     |     |     | 76  | 90  | 07  | 30  | 83  | 39  |     | 17  | 89  | 75  |     |     | 01  | 65  |     | 32  |     | 62  | 23  | 50  | 89  |
| S26 | -   | -   | -   | -   | -   | -   | -   | 2.2 | -   | -   | -   | -   | -   | -   | 0.6 | 0.5 | -   | -   | 2.4 | -   | 0.3 | -   | 0.8 | -   | -   | 2.1 | -   |
| 01  | 0.1 | 1.0 | 0.9 | 1.2 | 0.9 | 1.0 | 0.4 | 92  | 0.3 | 0.8 | 0.7 | 1.0 | 1.2 | 0.5 | 24  | 71  | 0.0 | 0.9 | 07  | 0.7 | 85  | 0.6 | 12  | 0.4 | 0.1 | 58  | 0.5 |
|     | 52  | 72  | 86  | 83  | 72  | 92  | 86  |     | 06  | 28  | 84  | 94  | 72  | 07  |     |     | 42  | 94  |     | 04  |     | 47  |     | 32  | 19  |     | 54  |
| S26 | 0.8 | 1.8 | 1.7 | -   | -   | -   | -   | -   | 0.6 | 0.5 | -   | -   | 0.3 | 1.0 | -   | -   | 0.3 | -   | 0.1 | -   | -   | 0.7 | -   | -   | 0.2 | 0.0 | 0.0 |
| 08  | 45  | 52  | 15  | 1.4 | 1.2 | 0.0 | 0.0 | 0.7 | 94  | 04  | 0.9 | 0.2 | 47  | 85  | 0.6 | 0.6 | 43  | 1.0 | 19  | 0.6 | 0.6 | 11  | 0.4 | 0.1 | 90  | 23  | 70  |
|     |     |     |     | 96  | 51  | 73  | 36  | 90  |     |     |     | 73  | 06  |     |     | 71  | 56  |     |     | 53  | 47  | 76  |     | 72  | 06  |     |     |
| S26 | -   | -   | -   | -   | -   | -   | -   | -   | -   | 0.4 | -   | 0.1 | 0.3 | 3.1 | 1.2 | 1.3 | 0.3 | -   | -   | -   | 0.7 | -   | -   | 0.5 | -   | 1.3 | 0.0 |
| 27  | 1.1 | 1.0 | 0.7 | 0.8 | 0.9 | 0.9 | 0.6 | 0.2 | 0.4 | 90  | 0.6 | 02  | 30  | 06  | 12  | 09  | 98  | 0.8 | 0.8 | 0.8 | 62  | 0.6 | 0.3 | 12  | 0.2 | 38  | 56  |
|     | 10  | 50  | 68  | 49  | 86  | 32  | 38  | 04  | 94  |     | 75  |     |     |     |     |     | 19  | 36  | 27  |     |     | 68  | 41  |     | 86  |     |     |
| S26 | -   | 0.2 | 1.4 | -   | 0.0 | -   | 0.5 | -   | -   | -   | -   | 0.4 | -   | -   | -   | -   | -   | -   | -   | -   | 1.7 | 0.8 | -   | -   | -   | -   | 1.9 |
| 32  | 1.0 | 85  | 83  | 1.1 | 17  | 0.7 | 74  | 1.1 | 0.6 | 0.7 | 0.7 | 49  | 1.2 | 0.1 | 0.6 | 1.0 | 0.1 | 1.0 | 1.0 | 0.7 | 84  | 43  | 0.5 | 0.7 | 0.7 | 0.5 | 82  |
|     | 19  |     |     | 80  | 77  |     | 43  | 69  | 98  | 52  |     | 35  | 34  | 79  | 61  | 26  | 66  | 79  | 91  |     |     | 21  | 18  | 22  | 07  |     |     |
| S26 | -   | 0.8 | 0.6 | 1.7 | 0.7 | -   | -   | -   | -   | -   | -   | -   | 0.3 | 0.1 | 1.3 | 0.1 | -   | -   | -   | 0.8 | -   | -   | -   | -   | -   | 1.3 | 0.0 |
| 63  | 1.9 | 44  | 73  | 99  | 72  | 0.4 | 0.0 | 0.6 | 0.6 | 0.7 | 0.9 | 0.2 | 28  | 96  | 87  | 64  | 0.4 | 0.8 | 0.4 | 33  | 0.1 | 0.7 | 0.3 | 0.7 | 0.4 | 08  | 54  |
|     | 80  |     |     |     |     | 05  | 44  | 80  | 99  | 23  | 75  | 15  |     |     |     |     | 06  | 20  | 12  |     | 27  | 31  | 38  | 56  | 67  |     |     |
| S26 | 0.2 | 0.0 | 0.1 | 0.3 | 1.3 | -   | 0.4 | -   | 0.2 | -   | 0.1 | -   | -   | -   | -   | -   | -   | 0.4 | -   | -   | -   | -   | -   | 2.2 | -   | -   | -   |
| 80  | 00  | 08  | 34  | 05  | 04  | 0.6 | 23  | 0.6 | 84  | 0.8 | 63  | 0.1 | 1.2 | 0.7 | 0.6 | 0.6 | 0.7 | 23  | 1.0 | 0.5 | 0.8 | 0.7 | 0.2 | 77  | 0.4 | 0.5 | 0.3 |
|     |     |     |     |     | 14  |     | 69  |     | 51  |     | 23  | 99  | 32  | 86  | 00  | 77  |     |     | 74  | 88  | 21  | 42  | 61  |     | 57  | 77  | 33  |
| S27 | -   | -   | -   | -   | 0.0 | -   | 0.4 | -   | 0.5 | -   | -   | 2.8 | -   | -   | 1.0 | -   | -   | -   | -   | -   | -   | -   | -   | -   | -   | 0.1 | 1.7 |
| 26  | 1.0 | 1.2 | 0.5 | 0.6 | 84  | 0.5 | 87  | 1.0 | 30  | 0.8 | 0.7 | 52  | 0.0 | 0.4 | 85  | 1.0 | 0.9 | 0.6 | 1.1 | 0.2 | 0.9 | 0.2 | 0.5 | 0.2 | 0.5 | 16  | 60  |
|     | 78  | 02  | 94  | 51  |     | 82  |     | 67  |     | 29  | 84  |     | 67  | 95  |     | 16  | 41  | 11  | 42  | 79  | 21  | 50  | 40  | 75  | 84  |     |     |
| S28 | -   | 0.6 | 0.9 | 1.0 | 0.8 | -   | -   | -   | 0.4 | -   | 0.3 | -   | 0.0 | -   | 1.0 | -   | -   | 0.6 | -   | -   | -   | 0.1 | 0.0 | 0.4 | 0.4 | 0.2 | -   |
| 17  | 1.0 | 67  | 23  | 84  | 18  | 0.1 | 0.1 | 0.7 | 34  | 0.7 | 37  | 0.3 | 55  | 0.2 | 15  | 0.2 | 0.0 | 13  | 0.5 | 0.8 | 0.6 | 37  | 43  | 30  | 05  | 61  | 0.1 |
|     | 15  |     |     |     | 37  | 48  | 44  |     | 96  |     | 43  |     | 02  |     |     | 69  | 22  |     | 09  | 34  | 51  |     |     |     |     | 66  |     |
| S28 | 2.1 | 1.7 | 0.9 | 0.8 | -   | -   | -   | -   | 0.5 | -   | 0.6 | -   | 0.5 | -   | -   | 0.3 | 0.5 | -   | -   | -   | 0.7 | 1.2 | -   | -   | -   | -   | -   |
| 46  | 95  | 31  | 87  | 44  | 0.8 | 0.5 | 0.6 | 0.1 | 21  | 0.6 | 77  | 0.0 | 65  | 0.8 | 0.3 | 24  | 48  | 0.8 | 0.0 | 0.3 | 99  | 83  | 0.3 | 0.4 | 0.8 | 1.0 | 1.1 |
|     |     |     |     |     | 17  | 41  | 24  | 45  |     | 88  |     | 58  |     | 57  | 02  |     |     |     | 00  | 35  | 00  |     | 15  | 57  | 79  | 41  | 20  |

|     |     |     |     |     |     |     |     |     |     |     |     |     |     |     |     |     |     |     |     |     |     |     |     |     |     |     |     |
|-----|-----|-----|-----|-----|-----|-----|-----|-----|-----|-----|-----|-----|-----|-----|-----|-----|-----|-----|-----|-----|-----|-----|-----|-----|-----|-----|-----|
| S28 | -   | 1.3 | 0.7 | 0.7 | 0.7 | -   | -   | -   | -   | -   | 1.1 | -   | -   | -   | 0.2 | -   | -   | -   | -   | -   | -   | -   | -   | -   | 0.4 | 0.6 |     |
| 83  | 0.8 | 03  | 82  | 14  | 65  | 1.2 | 0.8 | 0.3 | 0.6 | 0.5 | 51  | 0.1 | 0.9 | 0.5 | 63  | 0.6 | 0.9 | 1.1 | 1.1 | 0.8 | 0.7 | 0.7 | 0.4 | 0.6 | 0.8 | 24  | 14  |
|     | 28  |     |     |     |     | 56  | 76  | 05  | 99  | 38  |     | 42  | 19  | 92  |     | 87  | 42  | 47  | 12  | 11  | 41  | 32  | 57  | 39  | 11  |     |     |
| S29 | -   | 0.6 | -   | -   | -   | -   | -   | -   | -   | -   | -   | -   | -   | -   | -   | -   | -   | -   | -   | 0.4 | -   | -   | -   | -   | -   | 1.4 | 0.4 |
| 27  | 0.5 | 41  | 0.8 | 0.4 | 0.7 | 0.9 | 0.8 | 0.6 | 0.6 | 1.0 | 0.3 | 0.7 | 1.4 | 0.5 | 1.2 | 1.1 | 0.4 | 0.8 | 0.9 | 0.7 | 50  | 1.0 | 0.5 | 0.0 | 0.7 | 93  | 55  |
|     | 60  |     | 56  | 79  | 89  | 00  | 76  | 90  | 99  | 09  | 33  | 17  | 91  | 52  | 36  | 20  | 21  | 12  | 76  | 01  |     | 19  | 68  | 48  | 87  |     |     |
| S29 | 0.7 | -   | 0.0 | -   | -   | -   | -   | -   | -   | -   | 0.0 | -   | -   | -   | 0.2 | 1.7 | -   | 0.2 | -   | -   | 1.6 | -   | 0.2 | -   | 0.1 | -   | 0.5 |
| 67  | 91  | 0.7 | 85  | 0.8 | 0.2 | 0.8 | 0.8 | 0.4 | 0.6 | 0.0 | 24  | 0.8 | 0.3 | 0.2 | 53  | 41  | 0.2 | 71  | 0.1 | 0.5 | 21  | 0.1 | 40  | 0.4 | 56  | 0.6 | 30  |
|     |     | 22  |     | 97  | 87  | 55  | 76  | 97  | 99  | 41  |     | 76  | 15  | 40  |     |     | 66  |     | 72  | 90  |     | 50  |     | 96  |     | 98  |     |
| S29 | 0.8 | -   | -   | -   | -   | -   | -   | -   | -   | 0.4 | -   | -   | 0.3 | -   | -   | -   | -   | -   | -   | 1.0 | -   | -   | -   | 0.7 | -   | 0.1 | 0.0 |
| 71  | 90  | 0.9 | 0.6 | 0.1 | 1.5 | 1.0 | 0.8 | 0.6 | 0.6 | 66  | 0.6 | 0.4 | 01  | 0.6 | 0.0 | 0.1 | 1.2 | 0.8 | 0.6 | 56  | 1.0 | 0.7 | 0.2 | 27  | 0.7 | 66  | 33  |
|     |     | 80  | 32  | 55  | 59  | 83  | 76  | 86  | 99  |     | 83  | 17  |     | 38  | 90  | 64  | 29  | 24  | 00  |     | 22  | 56  | 04  |     | 77  |     |     |

**Table S3:** Dietary patterns obtained through PCA factorial analysis and orthogonal rotation.

| Food Groups            | Foods Included                                                                                                                      | Pattern 2: Saturated Fat and Simple Carbohydrates | Pattern 1: Proteins and Complex Carbohydrates |
|------------------------|-------------------------------------------------------------------------------------------------------------------------------------|---------------------------------------------------|-----------------------------------------------|
| <b>1. Milk</b>         | Skim and Whole Milk                                                                                                                 |                                                   |                                               |
| <b>2. Yogurt</b>       | Yogurt Flavoured, Yakult, Yogurt Actiregularis®, Yogurt Natural                                                                     |                                                   |                                               |
| <b>3. Cheese</b>       | Oaxaca, Manchego, American, and Cream Cheese                                                                                        |                                                   |                                               |
| <b>4. Fruit</b>        | Strawberry, Tangerine, Orange, Banana, Peach, Apple, Pear, Grapes, Mango, Plums, Pineapple, Papaya, Melon, Watermelon, Orange Juice |                                                   |                                               |
| <b>5. Vegetables</b>   | Tomato, Carrot, Cucumber, Jicama, Lettuce, Zucchini, Nopal, Broccoli                                                                |                                                   | 0.5806                                        |
| <b>6. Legumes</b>      | Beans, Peas, Lentils                                                                                                                |                                                   | 0.527                                         |
| <b>7. Avocado</b>      | Avocado                                                                                                                             | -0.41                                             |                                               |
| <b>8. Maize</b>        | Corn Tortilla, Corn                                                                                                                 |                                                   |                                               |
| <b>9. Chillies</b>     | Canned Chillies, Hot Sauce                                                                                                          |                                                   | 0.5908                                        |
| <b>10. Rice</b>        | Rice                                                                                                                                |                                                   |                                               |
| <b>11. Egg</b>         | Eggs                                                                                                                                |                                                   | 0.5042                                        |
| <b>12. Fish</b>        | Fish, Sardines, Tuna                                                                                                                |                                                   | 0.5541                                        |
| <b>13. Chicken</b>     | Chicken and Liver Chicken                                                                                                           |                                                   | 0.5857                                        |
| <b>14. Sausages</b>    | Turkey Sausage, Turkey Ham, Pork Sausage, Pork Ham, Chorizo                                                                         | 0.4851                                            |                                               |
| <b>15. Red Meat</b>    | Barbacoa, Beef, Pork, Chicharron, Bacon                                                                                             |                                                   | 0.3861                                        |
| <b>16. Sweet Bread</b> | Cake, Sweet Cookies and Bread, Filled Cupcakes, Hot Cake                                                                            | 0.5294                                            |                                               |

|                                   |                                                                                                                          |         |         |
|-----------------------------------|--------------------------------------------------------------------------------------------------------------------------|---------|---------|
| <b>17. Industrialized Cereals</b> | Sweet Cereal, Cereal Bars, Sugar Free Cereal                                                                             |         |         |
| <b>18. Potato</b>                 | Potato                                                                                                                   | 0.5973  |         |
| <b>19. Flours</b>                 | Bolillo, White bread, Pasta                                                                                              | 0.424   |         |
| <b>20. Grains Cereals</b>         | Whole Wheat Bread, Fiber Cereal, Oats                                                                                    |         | 0.4515  |
| <b>21. Mexican Dishes</b>         | Torta, Tamale, Pozole, Tacos al pastor (Pork), Sopas, Carnitas (Pork)                                                    |         |         |
| <b>22. Fast Food</b>              | Burger, Hot dog, Pizza, Chicken Nuggets, Sandwich, French Fries                                                          | 0.548   |         |
| <b>23. Salty Snacks</b>           | Peanuts, Snacks, Crisps, Popcorn                                                                                         | 0.434   |         |
| <b>24. Desserts</b>               | Milkshake, Chocolate Milk, Danonino, Ice Cream, Chocolate, jam, Chamoy Candy                                             |         |         |
| <b>25. Dressings</b>              | Dressing, Mayonnaise, Butter                                                                                             | 0.5506  |         |
| <b>26. Sweet Beverages</b>        | Cola Soft Drink, Fruit Soft Drink, Industrialized Juices, Hydrating Drinks, Water with Artificial Flavoring, Fruit Water |         | -0.4087 |
| <b>27. Water</b>                  | Water                                                                                                                    | -0.7793 |         |

Factor loadings or correlation coefficients between the variables (rows: groups of foods) and factors (columns: patterns 1 and 2).

**Table S4:** Dietary pattern score obtained for each child that participated based on their reported diet.

| SampleID | Pattern1   | Pattern2   |
|----------|------------|------------|
| S117     | 0.3205371  | 0.5758733  |
| S134     | 0.1440915  | -0.9681191 |
| S179     | -1.170841  | -0.4113157 |
| S201     | 0.9401742  | 0.143073   |
| S329     | 0.1623228  | -1.05331   |
| S339     | -0.0579411 | -1.044442  |
| S402     | 0.5130515  | 0.2638562  |
| S573     | -0.3296513 | 0.7141154  |
| S578     | 3.497206   | -0.5026956 |
| S847     | 1.25227    | 0.5405591  |
| S865     | 0.4539231  | -0.2415238 |
| S884     | 0.1391787  | 1.057557   |
| S1531    | -1.451602  | 0.5943944  |
| S1708    | -0.6210954 | 0.3915844  |
| S1914    | -0.0851043 | -0.7586012 |
| S1922    | -0.6085021 | 2.942155   |
| S1969    | -0.0886021 | 2.483942   |
| S1972    | 0.6682865  | 1.843158   |
| S2146    | 0.6341589  | -1.465647  |
| S2148    | 0.2025058  | 0.9404573  |
| S2213    | 2.288327   | 1.132702   |
| S2216    | 2.511243   | -0.397457  |
| S2221    | 0.8065155  | -1.299773  |
| S2269    | -0.3801049 | 0.3659545  |
| S2270    | -0.0431866 | 0.9992714  |
| S2289    | 0.5796062  | -0.3786825 |

|              |            |            |
|--------------|------------|------------|
| <b>S2345</b> | -0.8007509 | 1.265548   |
| <b>S2429</b> | 0.4174601  | 0.4636037  |
| <b>S2452</b> | -1.154805  | -1.252507  |
| <b>S2468</b> | -0.9809453 | -0.2169433 |
| <b>S2527</b> | 0.0232354  | -0.6029029 |
| <b>S2593</b> | -0.5400318 | -0.8162261 |
| <b>S2600</b> | 0.4270049  | -0.4282541 |
| <b>S2601</b> | -1.4277    | 0.4417136  |
| <b>S2608</b> | -0.6509099 | 0.1371638  |
| <b>S2627</b> | -0.75928   | 0.1697606  |
| <b>S2632</b> | -0.6678567 | -1.465489  |
| <b>S2663</b> | -0.2033831 | -0.4476009 |
| <b>S2680</b> | -0.4065396 | -0.310024  |
| <b>S2726</b> | 0.4214248  | -1.822996  |
| <b>S2817</b> | 0.1120333  | 0.1744197  |
| <b>S2846</b> | -0.1584052 | 0.3756168  |
| <b>S2883</b> | -0.6839789 | -0.9429005 |
| <b>S2927</b> | -1.56976   | -0.8547883 |
| <b>S2967</b> | -0.6185966 | 0.125412   |
| <b>S2971</b> | -1.05498   | -0.4596928 |

**Table S5.** Relative abundance (>0.01%) of bacterial genera detected in fecal samples.

See file.



**Table S6:** Taxa (at genus or specie level) that contribute the most to beta diversity variation between NW and OWOB groups (SIMPER).

| Taxa                                         | Cumulative Relative Abundance | Taxa                                      | Cumulative Relative Abundance | Taxa                                          | Cumulative Relative Abundance |
|----------------------------------------------|-------------------------------|-------------------------------------------|-------------------------------|-----------------------------------------------|-------------------------------|
| <i>Prevotella copri</i>                      | 0.05639512                    | <i>[Eubacterium] siraeum</i>              | 0.43754507                    | <i>Bacteroides</i> sp.                        | 0.59895415                    |
| <i>Bacteroides dorei/vulgatus</i>            | 0.09469867                    | <i>Ruminococcus</i> sp. CAG:177           | 0.45489865                    | <i>Clostridium</i> sp. CAG:217                | 0.61009154                    |
| <i>Bacteroides stercoris</i>                 | 0.12424528                    | <i>Ruminococcus bicirculans</i>           | 0.46307388                    | <i>Bacteroides intestinalis</i> **            | 0.62093356                    |
| <i>Bacteroides rodentium/uniformis</i> +     | 0.15170272                    | <i>Rikenellaceae</i> sp.                  | 0.47121856                    | <i>Clostridium</i> sp. CAG:343                | 0.62623611                    |
| <i>Bacteroides cellulosilyticus/fragilis</i> | 0.17562738                    | <i>Faecalibacterium prausnitzii</i>       | 0.48728578                    | <i>Faecalibacterium prausnitzii</i>           | 0.64193336                    |
| <i>Eubacterium</i> sp. CAG:202               | 0.19898182                    | <i>Barnesiella intestinihominis</i>       | 0.49515177                    | <i>Dehalococcoides species incertae sedis</i> | 0.63151148                    |
| <i>Eubacterium</i> sp. CAG:180*              | 0.2209676                     | <i>Faecalibacterium</i> sp.               | 0.50239242                    | <i>Clostridium</i> sp. CAG:127                | 0.6367464                     |
| <i>Bacteroides caccae</i>                    | 0.24095906                    | <i>Bacteroides caecimuris</i>             | 0.50961052                    | <i>Ruminococcaceae species incertae sedis</i> | 0.64704771                    |
| <i>Ruminococcus bromii</i>                   | 0.25849825                    | <i>Bacteroides plebeius</i>               | 0.51682632                    | <i>Roseburia inulinivorans</i>                | 0.65714674                    |
| <i>Prevotella species incertae sedis</i>     | 0.27540254                    | <i>Firmicutes</i> sp.                     | 0.52392848                    | <i>Clostridium</i> sp. CAG:465                | 0.65211104                    |
| <i>Alistipes putredinis</i>                  | 0.29225987                    | <i>Alistipes shahii</i>                   | 0.5307857                     | <i>Clostridium</i> sp. CAG:567                | 0.66716776                    |
| <i>Bacteroides</i> sp.                       | 0.30876689                    | <i>Bacteroides coprocola</i>              | 0.53762254                    | <i>Alistipes finegoldii</i>                   | 0.67194751                    |
| <i>Dialister invisus</i>                     | 0.32493854                    | <i>Parabacteroides merdae</i>             | 0.55100433                    | <i>Methanobrevibacter smithii</i> *           | 0.67654813                    |
| <i>Akkermansia muciniphila</i>               | 0.33908238                    | <i>Bacteroides fragilis</i>               | 0.55758635                    | <i>Firmicutes species incertae sedis</i>      | 0.68109163                    |
| <i>Bacteroides massiliensis</i>              | 0.353011                      | <i>Faecalibacterium prausnitzii</i>       | 0.56388264                    | <i>Anaerotruncus</i> sp. CAG:528              | 0.68548795                    |
| <i>[Eubacterium] rectale</i>                 | 0.36521315                    | <i>Clostridium</i> sp. CAG:510            | 0.57597579                    | <i>Bacteroides eggerthii</i> +                | 0.68972822                    |
| <i>Clostridium</i> sp. CAG:302               | 0.3768737                     | <i>Bifidobacterium longum</i>             | 0.58179301                    | <i>Roseburia species incertae sedis</i> +     | 0.69395928                    |
| <i>Proteobacteria</i> sp.                    | 0.40918866                    | <i>Akkermansia species incertae sedis</i> | 0.58756496                    | <i>Clostridiales species incertae sedis</i>   | 0.70223109                    |

|                                                   |            |                                |            |
|---------------------------------------------------|------------|--------------------------------|------------|
| <i>Alistipes</i><br><i>finegoldii/onderdonkii</i> | 0.41935951 | <i>Clostridium</i> sp. CAG:594 | 0.59331688 |
|---------------------------------------------------|------------|--------------------------------|------------|

Cumulative contributions of most influential species are shown next to each genus. Pairwise comparisons using Wilcoxon rank sum test adjusted by FDR: +:  $0.1 \geq p \geq 0.05$ , \*:  $p \leq 0.05$ , \*\*:  $p \leq 0.01$

**Table S7.** KO representation analysis.

| KO_entr<br>ntry | Name                 | Definition                                                                                                          | log<br>FC | logC<br>PM | F          | PValue | FD<br>R   | Differentially<br>represented |
|-----------------|----------------------|---------------------------------------------------------------------------------------------------------------------|-----------|------------|------------|--------|-----------|-------------------------------|
| <b>K16907</b>   | K16907               | fluoroquinolone transport system ATP-binding protein [EC:3.6.3.-]                                                   | 4.40<br>2 | 5.316      | 20.8<br>45 | 0.000  | 0.0<br>02 | UP                            |
| <b>K02838</b>   | frr, MRRF, RRF       | ribosome recycling factor                                                                                           | 1.09<br>4 | 12.07<br>8 | 9.32<br>0  | 0.003  | 0.0<br>41 | UP                            |
| <b>K02864</b>   | RP-L10, MRPL10, rplJ | large subunit ribosomal protein L10                                                                                 | 1.18<br>6 | 11.94<br>4 | 9.79<br>2  | 0.003  | 0.0<br>34 | UP                            |
| <b>K14731</b>   | mlhB, chnC           | epsilon-lactone hydrolase [EC:3.1.1.83]                                                                             | 1.41<br>4 | 9.023      | 8.65<br>2  | 0.005  | 0.0<br>51 | UP                            |
| <b>K00949</b>   | thiN, TPK1, THI80    | thiamine pyrophosphokinase [EC:2.7.6.2]                                                                             | 1.54<br>9 | 11.71<br>0 | 11.7<br>09 | 0.001  | 0.0<br>17 | UP                            |
| <b>K09775</b>   | K09775               | uncharacterized protein                                                                                             | 1.71<br>5 | 10.33<br>1 | 10.5<br>79 | 0.002  | 0.0<br>26 | UP                            |
| <b>K01841</b>   | pepM                 | phosphoenolpyruvate phosphomutase [EC:5.4.2.9]                                                                      | 1.79<br>3 | 8.446      | 8.91<br>4  | 0.004  | 0.0<br>45 | UP                            |
| <b>K03366</b>   | butA, budC           | meso-butanediol dehydrogenase / (S,S)-butanediol dehydrogenase / diacetyl reductase [EC:1.1.1.- 1.1.1.76 1.1.1.304] | 1.97<br>1 | 4.421      | 10.5<br>54 | 0.002  | 0.0<br>30 | UP                            |
| <b>K19714</b>   | kdnB                 | 3-deoxy-alpha-D-manno-octulosonate 8-oxidase [EC:1.1.3.48]                                                          | 2.02<br>2 | 4.427      | 10.6<br>60 | 0.002  | 0.0<br>29 | UP                            |
| <b>K16872</b>   | E2.3.1.207           | beta-ketodecanoyl-[acyl-carrier-protein] synthase [EC:2.3.1.207]                                                    | 2.08<br>0 | 4.435      | 10.7<br>93 | 0.002  | 0.0<br>28 | UP                            |
| <b>K21400</b>   | ortB                 | 2-amino-4-ketopentanoate thiolase beta subunit [EC:2.3.1.263]                                                       | 2.22<br>6 | 4.531      | 9.83<br>1  | 0.003  | 0.0<br>34 | UP                            |
| <b>K18284</b>   | K18284               | adenosylhomocysteine/aminodeoxyfualosine nucleosidase [EC:3.2.2.9 3.2.2.30]                                         | 2.29<br>1 | 4.467      | 11.9<br>53 | 0.001  | 0.0<br>18 | UP                            |
| <b>K03821</b>   | phbC, phaC           | polyhydroxyalkanoate synthase subunit PhaC [EC:2.3.1.-]                                                             | 2.30<br>7 | 4.468      | 11.4<br>98 | 0.001  | 0.0<br>21 | UP                            |
| <b>K15363</b>   | FAN1, MTMR15         | fanconi-associated nuclease 1 [EC:3.1.21.- 3.1.4.1]                                                                 | 2.33<br>0 | 4.472      | 11.5<br>66 | 0.001  | 0.0<br>21 | UP                            |
| <b>K15216</b>   | RRN3, TIFIA          | RNA polymerase I-specific transcription initiation factor RRN3                                                      | 2.40<br>2 | 4.484      | 11.7<br>78 | 0.001  | 0.0<br>19 | UP                            |
| <b>K00587</b>   | ICMT, STE14          | protein-S-isoprenylcysteine O-methyltransferase [EC:2.1.1.100]                                                      | 2.47<br>3 | 4.497      | 12.9<br>45 | 0.001  | 0.0<br>14 | UP                            |

|               |            |                                                                                                           |           |       |            |       |           |    |
|---------------|------------|-----------------------------------------------------------------------------------------------------------|-----------|-------|------------|-------|-----------|----|
| <b>K00814</b> | GPT, ALT   | alanine transaminase [EC:2.6.1.2]                                                                         | 2.48<br>6 | 4.498 | 12.0<br>18 | 0.001 | 0.0<br>18 | UP |
| <b>K07110</b> | ramB       | XRE family transcriptional regulator, fatty acid utilization regulator                                    | 2.48<br>7 | 4.498 | 12.0<br>22 | 0.001 | 0.0<br>18 | UP |
| <b>K23160</b> | wabB, rfbU | GlcNAc transferase                                                                                        | 2.66<br>1 | 4.777 | 9.07<br>3  | 0.004 | 0.0<br>43 | UP |
| <b>K05499</b> | cytR       | LacI family transcriptional regulator, repressor for deo operon, udp, cdd, tsx, nupC, and nupG            | 2.67<br>6 | 5.493 | 8.99<br>1  | 0.004 | 0.0<br>44 | UP |
| <b>K01228</b> | MOGS       | mannosyl-oligosaccharide glucosidase [EC:3.2.1.106]                                                       | 2.68<br>4 | 4.534 | 12.5<br>61 | 0.001 | 0.0<br>15 | UP |
| <b>K15311</b> | pksG       | polyketide biosynthesis 3-hydroxy-3-methylglutaryl-CoA synthase-like enzyme PksG                          | 2.72<br>2 | 4.544 | 12.7<br>37 | 0.001 | 0.0<br>15 | UP |
| <b>K03528</b> | zipA       | cell division protein ZipA                                                                                | 2.80<br>3 | 5.809 | 9.67<br>3  | 0.003 | 0.0<br>36 | UP |
| <b>K13670</b> | pimF       | putative glycosyltransferase [EC:2.4.-.-]                                                                 | 2.81<br>2 | 5.320 | 9.14<br>3  | 0.004 | 0.0<br>42 | UP |
| <b>K10917</b> | aphA       | PadR family transcriptional regulator, regulatory protein AphA                                            | 2.84<br>4 | 4.941 | 9.72<br>0  | 0.003 | 0.0<br>35 | UP |
| <b>K22255</b> | ATPIF1     | ATPase inhibitor, mitochondrial                                                                           | 2.85<br>7 | 4.572 | 13.6<br>06 | 0.001 | 0.0<br>11 | UP |
| <b>K10795</b> | prdD       | D-proline reductase (dithiol)-stabilizing protein PrdD                                                    | 2.87<br>7 | 4.778 | 11.3<br>60 | 0.001 | 0.0<br>19 | UP |
| <b>K00682</b> | GGCT       | gamma-glutamylcyclotransferase [EC:4.3.2.9]                                                               | 2.89<br>7 | 4.582 | 14.4<br>37 | 0.000 | 0.0<br>08 | UP |
| <b>K19713</b> | tsdA       | thiosulfate dehydrogenase [EC:1.8.2.2]                                                                    | 2.96<br>6 | 4.719 | 11.8<br>90 | 0.001 | 0.0<br>16 | UP |
| <b>K21405</b> | acoR       | sigma-54 dependent transcriptional regulator, acetoin dehydrogenase operon transcriptional activator AcoR | 2.97<br>2 | 4.751 | 12.0<br>96 | 0.001 | 0.0<br>15 | UP |
| <b>K18652</b> | ntdC       | glucose-6-phosphate 3-dehydrogenase [EC:1.1.1.361]                                                        | 3.03<br>0 | 4.864 | 10.0<br>77 | 0.002 | 0.0<br>32 | UP |
| <b>K11940</b> | hspQ       | heat shock protein HspQ                                                                                   | 3.03<br>3 | 6.083 | 8.92<br>8  | 0.004 | 0.0<br>45 | UP |
| <b>K00143</b> | LYS2       | L-2-aminoadipate reductase [EC:1.2.1.95]                                                                  | 3.05<br>0 | 4.618 | 13.5<br>64 | 0.001 | 0.0<br>11 | UP |
| <b>K14989</b> | salR       | two-component system, NarL family, secretion system response regulator SalR                               | 3.12<br>7 | 6.817 | 11.9<br>71 | 0.001 | 0.0<br>16 | UP |

|               |             |                                                                                                    |                |       |            |       |           |    |
|---------------|-------------|----------------------------------------------------------------------------------------------------|----------------|-------|------------|-------|-----------|----|
| <b>K21006</b> | pelA        | polysaccharide biosynthesis protein PelA                                                           | 3.14<br>6      | 4.639 | 14.5<br>90 | 0.000 | 0.0<br>08 | UP |
| <b>K13498</b> | trpCF       | indole-3-glycerol phosphate synthase / phosphoribosylanthranilate isomerase [EC:4.1.1.48 5.3.1.24] | 3.18<br>5      | 7.696 | 10.1<br>79 | 0.002 | 0.0<br>30 | UP |
| <b>K01363</b> | CTSB        | cathepsin B [EC:3.4.22.1]                                                                          | 3.18<br>8      | 4.647 | 13.7<br>94 | 0.001 | 0.0<br>10 | UP |
| <b>K04646</b> | CLTC        | clathrin heavy chain                                                                               | 3.23<br>9      | 4.660 | 13.9<br>08 | 0.001 | 0.0<br>10 | UP |
| <b>K20179</b> | VPS11, PEP5 | vacuolar protein sorting-associated protein 11                                                     | 3.50<br>8      | 4.735 | 14.4<br>74 | 0.000 | 0.0<br>08 | UP |
| <b>K23661</b> | escl        | type III secretion system protein                                                                  | 3.59<br>9      | 4.766 | 15.2<br>72 | 0.000 | 0.0<br>06 | UP |
| <b>K08568</b> | CTSZ        | cathepsin X [EC:3.4.18.1]                                                                          | 4.26<br>2      | 5.005 | 15.8<br>00 | 0.000 | 0.0<br>05 | UP |
| <b>K02656</b> | pilF        | type IV pilus assembly protein PilF                                                                | 4.83<br>7      | 5.269 | 17.9<br>25 | 0.000 | 0.0<br>03 | UP |
| <b>K16906</b> | K16906      | fluoroquinolone transport system permease protein                                                  | 5.01<br>9      | 6.684 | 19.7<br>39 | 0.000 | 0.0<br>02 | UP |
| <b>K15868</b> | baiB        | bile acid-coenzyme A ligase [EC:6.2.1.7]                                                           | 5.08<br>7      | 6.446 | 17.1<br>50 | 0.000 | 0.0<br>03 | UP |
| <b>K16905</b> | K16905      | fluoroquinolone transport system permease protein                                                  | 5.38<br>7      | 6.998 | 20.5<br>69 | 0.000 | 0.0<br>02 | UP |
| <b>K19161</b> | yafN        | antitoxin YafN                                                                                     | 5.83<br>1      | 7.197 | 27.4<br>12 | 0.000 | 0.0<br>00 | UP |
| <b>K21488</b> | yobK        | antitoxin YobK                                                                                     | -<br>4.43<br>2 | 6.307 | 27.4<br>26 | 0.000 | 0.0<br>00 | DN |
| <b>K01414</b> | prlC        | oligopeptidase A [EC:3.4.24.70]                                                                    | -<br>5.39<br>2 | 7.108 | 32.8<br>22 | 0.000 | 0.0<br>00 | DN |
| <b>K19266</b> | E1.2.1.22   | lactaldehyde dehydrogenase [EC:1.2.1.22]                                                           | -<br>4.32<br>1 | 4.859 | 23.5<br>61 | 0.000 | 0.0<br>02 | DN |
| <b>K07728</b> | K07728      | putative transcriptional regulator                                                                 | -<br>4.14<br>8 | 4.800 | 22.9<br>77 | 0.000 | 0.0<br>02 | DN |

|               |        |                                                                                                     |                |            |            |       |           |    |
|---------------|--------|-----------------------------------------------------------------------------------------------------|----------------|------------|------------|-------|-----------|----|
| <b>K18967</b> | dge1   | diguanylate cyclase [EC:2.7.7.65]                                                                   | -<br>4.13<br>9 | 4.799      | 23.9<br>87 | 0.000 | 0.0<br>02 | DN |
| <b>K13942</b> | hmd    | 5,10-methenyltetrahydromethanopterin hydrogenase [EC:1.12.98.2]                                     | -<br>4.12<br>8 | 4.793      | 23.1<br>74 | 0.000 | 0.0<br>02 | DN |
| <b>K17717</b> | pld    | phospholipase D [EC:3.1.4.4]                                                                        | -<br>3.98<br>7 | 4.753      | 24.4<br>40 | 0.000 | 0.0<br>02 | DN |
| <b>K10938</b> | acfC   | accessory colonization factor AcfC                                                                  | -<br>3.93<br>3 | 4.744      | 21.6<br>42 | 0.000 | 0.0<br>02 | DN |
| <b>K06961</b> | KRR1   | ribosomal RNA assembly protein                                                                      | -<br>3.92<br>3 | 4.865      | 25.1<br>11 | 0.000 | 0.0<br>01 | DN |
| <b>K11176</b> | purO   | IMP cyclohydrolase [EC:3.5.4.10]                                                                    | -<br>3.86<br>9 | 4.715      | 22.1<br>34 | 0.000 | 0.0<br>02 | DN |
| <b>K03413</b> | cheY   | two-component system, chemotaxis family, chemotaxis protein CheY                                    | -<br>3.79<br>4 | 11.95<br>9 | 34.8<br>39 | 0.000 | 0.0<br>00 | DN |
| <b>K09739</b> | mptD   | dihydroneopterin aldolase [EC:4.1.2.25]                                                             | -<br>3.76<br>8 | 4.687      | 21.7<br>72 | 0.000 | 0.0<br>02 | DN |
| <b>K23264</b> | purS   | phosphoribosylformylglycinamide synthase subunit PurS [EC:6.3.5.3]                                  | -<br>3.76<br>0 | 4.685      | 21.0<br>06 | 0.000 | 0.0<br>02 | DN |
| <b>K00368</b> | nirK   | nitrite reductase (NO-forming) [EC:1.7.2.1]                                                         | -<br>3.74<br>7 | 4.687      | 21.7<br>12 | 0.000 | 0.0<br>02 | DN |
| <b>K09139</b> | K09139 | uncharacterized protein                                                                             | -<br>3.74<br>0 | 4.680      | 23.0<br>04 | 0.000 | 0.0<br>02 | DN |
| <b>K07072</b> | mfnF   | (4-(4-[2-(gamma-L-glutamylamino)ethyl]phenoxy)methyl)furan-2-yl)methanamine synthase [EC:2.5.1.131] | -<br>3.72<br>9 | 4.677      | 21.9<br>31 | 0.000 | 0.0<br>02 | DN |

|               |                    |                                                                                                 |                |       |            |       |           |    |
|---------------|--------------------|-------------------------------------------------------------------------------------------------|----------------|-------|------------|-------|-----------|----|
| <b>K19175</b> | dptH               | DNA phosphorothioation-dependent restriction protein DptH                                       | -<br>3.71<br>3 | 5.080 | 18.0<br>77 | 0.000 | 0.0<br>03 | DN |
| <b>K18974</b> | sul1               | dihydropteroate synthase type 1 [EC:2.5.1.15]                                                   | -<br>3.67<br>2 | 4.666 | 23.6<br>85 | 0.000 | 0.0<br>02 | DN |
| <b>K22447</b> | cct, ths           | archaeal chaperonin                                                                             | -<br>3.64<br>4 | 4.655 | 21.6<br>79 | 0.000 | 0.0<br>02 | DN |
| <b>K01001</b> | ALG7               | UDP-N-acetylglucosamine--dolichyl-phosphate N-acetylglucosaminephosphotransferase [EC:2.7.8.15] | -<br>3.63<br>8 | 4.653 | 21.4<br>18 | 0.000 | 0.0<br>02 | DN |
| <b>K00021</b> | HMGCR              | hydroxymethylglutaryl-CoA reductase (NADPH) [EC:1.1.1.34]                                       | -<br>3.62<br>1 | 4.649 | 21.6<br>10 | 0.000 | 0.0<br>02 | DN |
| <b>K18975</b> | ebr,<br>qacEdelta1 | small multidrug resistance pump                                                                 | -<br>3.61<br>7 | 4.653 | 23.1<br>57 | 0.000 | 0.0<br>02 | DN |
| <b>K16509</b> | spxA               | regulatory protein spx                                                                          | -<br>3.60<br>7 | 5.506 | 16.3<br>05 | 0.000 | 0.0<br>03 | DN |
| <b>K22081</b> | mgsA               | methylamine---glutamate N-methyltransferase subunit A [EC:2.1.1.21]                             | -<br>3.55<br>7 | 4.634 | 21.2<br>77 | 0.000 | 0.0<br>02 | DN |
| <b>K19824</b> | fprB               | rubrerythrin                                                                                    | -<br>3.51<br>6 | 4.624 | 21.2<br>41 | 0.000 | 0.0<br>02 | DN |
| <b>K02910</b> | RP-L31e,<br>RPL31  | large subunit ribosomal protein L31e                                                            | -<br>3.50<br>8 | 4.649 | 29.4<br>86 | 0.000 | 0.0<br>00 | DN |
| <b>K02243</b> | comGA              | competence protein ComGA                                                                        | -<br>3.45<br>5 | 4.775 | 20.2<br>32 | 0.000 | 0.0<br>02 | DN |
| <b>K07765</b> | MBTPS2             | S2P endopeptidase [EC:3.4.24.85]                                                                | -<br>3.45<br>0 | 4.608 | 20.9<br>54 | 0.000 | 0.0<br>02 | DN |

|               |                  |                                                                                                                          |                |            |            |       |           |    |
|---------------|------------------|--------------------------------------------------------------------------------------------------------------------------|----------------|------------|------------|-------|-----------|----|
| <b>K01512</b> | acyP             | acylphosphatase [EC:3.6.1.7]                                                                                             | -<br>3.44<br>9 | 10.52<br>0 | 27.5<br>56 | 0.000 | 0.0<br>00 | DN |
| <b>K22223</b> | pgp              | phosphoglycolate phosphatase [EC:3.1.3.18]                                                                               | -<br>3.42<br>8 | 4.885      | 16.5<br>93 | 0.000 | 0.0<br>03 | DN |
| <b>K14094</b> | ehaC             | energy-converting hydrogenase A subunit C                                                                                | -<br>3.41<br>1 | 4.600      | 20.8<br>60 | 0.000 | 0.0<br>02 | DN |
| <b>K01170</b> | endA             | tRNA-intron endonuclease, archaea type [EC:4.6.1.16]                                                                     | -<br>3.39<br>0 | 4.595      | 20.7<br>37 | 0.000 | 0.0<br>02 | DN |
| <b>K06875</b> | PDCD5,<br>TFAR19 | programmed cell death protein 5                                                                                          | -<br>3.34<br>9 | 4.586      | 20.5<br>67 | 0.000 | 0.0<br>02 | DN |
| <b>K14096</b> | ehaE             | energy-converting hydrogenase A subunit E                                                                                | -<br>3.31<br>6 | 4.579      | 20.4<br>89 | 0.000 | 0.0<br>02 | DN |
| <b>K12243</b> | pchR             | AraC family transcriptional regulator, transcriptional activator of the genes for pyochelin and ferripyochelin receptors | -<br>3.28<br>8 | 4.577      | 19.5<br>35 | 0.000 | 0.0<br>03 | DN |
| <b>K09738</b> | K09738           | uncharacterized protein                                                                                                  | -<br>3.28<br>2 | 4.571      | 20.2<br>96 | 0.000 | 0.0<br>03 | DN |
| <b>K00340</b> | nuoK             | NADH-quinone oxidoreductase subunit K [EC:7.1.1.2]                                                                       | -<br>3.26<br>2 | 11.25<br>9 | 40.7<br>44 | 0.000 | 0.0<br>00 | DN |
| <b>K02709</b> | psbH             | photosystem II PsbH protein                                                                                              | -<br>3.25<br>4 | 4.566      | 19.3<br>15 | 0.000 | 0.0<br>03 | DN |
| <b>K03167</b> | top6B            | DNA topoisomerase VI subunit B [EC:5.6.2.2]                                                                              | -<br>3.25<br>0 | 4.760      | 17.1<br>87 | 0.000 | 0.0<br>03 | DN |
| <b>K22224</b> | acdB             | acetate---CoA ligase (ADP-forming) subunit beta [EC:6.2.1.13]                                                            | -<br>3.23<br>8 | 4.563      | 21.6<br>86 | 0.000 | 0.0<br>02 | DN |



|               |                     |                                                                                    |                |            |            |       |           |    |
|---------------|---------------------|------------------------------------------------------------------------------------|----------------|------------|------------|-------|-----------|----|
| <b>K02966</b> | RP-S19e,<br>RPS19   | small subunit ribosomal protein S19e                                               | -<br>3.23<br>5 | 4.562      | 20.0<br>72 | 0.000 | 0.0<br>03 | DN |
| <b>K14168</b> | CTU1, NCS6          | cytoplasmic tRNA 2-thiolation protein 1 [EC:2.7.7.-]                               | -<br>3.22<br>8 | 4.560      | 20.0<br>11 | 0.000 | 0.0<br>03 | DN |
| <b>K03166</b> | top6A               | DNA topoisomerase VI subunit A [EC:5.6.2.2]                                        | -<br>3.16<br>4 | 4.836      | 14.3<br>78 | 0.000 | 0.0<br>07 | DN |
| <b>K00584</b> | mtrH                | tetrahydromethanopterin S-methyltransferase subunit H [EC:2.1.1.86]                | -<br>3.15<br>1 | 4.918      | 12.9<br>27 | 0.001 | 0.0<br>11 | DN |
| <b>K03299</b> | TC.GNTP             | gluconate:H <sup>+</sup> symporter, GntP family                                    | -<br>3.14<br>7 | 12.01<br>0 | 32.2<br>30 | 0.000 | 0.0<br>00 | DN |
| <b>K00094</b> | E1.1.1.251,<br>gatD | galactitol-1-phosphate 5-dehydrogenase [EC:1.1.1.251]                              | -<br>3.14<br>1 | 4.795      | 16.0<br>76 | 0.000 | 0.0<br>04 | DN |
| <b>K16793</b> | aksE                | methanogen homoaconitase small subunit [EC:4.2.1.114]                              | -<br>3.13<br>0 | 4.542      | 18.8<br>55 | 0.000 | 0.0<br>03 | DN |
| <b>K14097</b> | ehaF                | energy-converting hydrogenase A subunit F                                          | -<br>3.12<br>5 | 4.541      | 19.6<br>34 | 0.000 | 0.0<br>03 | DN |
| <b>K17884</b> | E2.7.8.39           | archaetidylinositol phosphate synthase [EC:2.7.8.39]                               | -<br>3.12<br>1 | 4.539      | 19.6<br>07 | 0.000 | 0.0<br>03 | DN |
| <b>K02530</b> | lacR                | DeoR family transcriptional regulator, lactose phosphotransferase system repressor | -<br>3.11<br>2 | 5.270      | 13.2<br>06 | 0.001 | 0.0<br>10 | DN |
| <b>K06914</b> | mfnD                | tyramine---L-glutamate ligase [EC:6.3.4.24]                                        | -<br>3.10<br>6 | 4.537      | 18.7<br>64 | 0.000 | 0.0<br>03 | DN |
| <b>K12678</b> | aidA-I, misL        | autotransporter family porin                                                       | -<br>3.06<br>8 | 6.456      | 11.5<br>39 | 0.001 | 0.0<br>18 | DN |

|               |                        |                                                                                                  |                |            |            |       |           |    |
|---------------|------------------------|--------------------------------------------------------------------------------------------------|----------------|------------|------------|-------|-----------|----|
| <b>K14080</b> | mtaA                   | [methyl-Co(III) methanol-specific corrinoid protein]:coenzyme M methyltransferase [EC:2.1.1.246] | -<br>3.06<br>3 | 4.529      | 19.3<br>89 | 0.000 | 0.0<br>03 | DN |
| <b>K21306</b> | aglB                   | dolichyl-phosphooligosaccharide-protein glycotransferase [EC:2.4.99.21]                          | -<br>3.04<br>8 | 4.526      | 18.5<br>39 | 0.000 | 0.0<br>03 | DN |
| <b>K14095</b> | ehaD                   | energy-converting hydrogenase A subunit D                                                        | -<br>3.02<br>9 | 4.523      | 19.1<br>94 | 0.000 | 0.0<br>03 | DN |
| <b>K04480</b> | mtaB                   | methanol--5-hydroxybenzimidazolylcobamide Co-methyltransferase [EC:2.1.1.90]                     | -<br>3.02<br>4 | 4.522      | 19.3<br>09 | 0.000 | 0.0<br>03 | DN |
| <b>K16792</b> | aksD                   | methanogen homoaconitase large subunit [EC:4.2.1.114]                                            | -<br>3.02<br>1 | 4.521      | 19.3<br>40 | 0.000 | 0.0<br>03 | DN |
| <b>K14109</b> | ehaR                   | energy-converting hydrogenase A subunit R                                                        | -<br>2.99<br>3 | 4.516      | 19.1<br>22 | 0.000 | 0.0<br>03 | DN |
| <b>K02929</b> | RP-L44e,<br>RPL44      | large subunit ribosomal protein L44e                                                             | -<br>2.92<br>1 | 4.504      | 18.7<br>76 | 0.000 | 0.0<br>03 | DN |
| <b>K09728</b> | K09728                 | uncharacterized protein                                                                          | -<br>2.92<br>1 | 4.504      | 18.8<br>57 | 0.000 | 0.0<br>03 | DN |
| <b>K08093</b> | hxlA                   | 3-hexulose-6-phosphate synthase [EC:4.1.2.43]                                                    | -<br>2.91<br>4 | 5.319      | 10.3<br>51 | 0.002 | 0.0<br>29 | DN |
| <b>K11600</b> | RRP41,<br>EXOSC4, SKI6 | exosome complex component RRP41                                                                  | -<br>2.89<br>9 | 4.500      | 18.7<br>24 | 0.000 | 0.0<br>03 | DN |
| <b>K00537</b> | arsC                   | arsenate reductase (glutaredoxin) [EC:1.20.4.1]                                                  | -<br>2.89<br>2 | 11.29<br>5 | 31.7<br>61 | 0.000 | 0.0<br>00 | DN |
| <b>K14587</b> | sgcE                   | protein sgcE [EC:5.1.3.-]                                                                        | -<br>2.85<br>9 | 4.496      | 19.4<br>56 | 0.000 | 0.0<br>03 | DN |

|                    |                   |                                                       |                |       |            |       |           |    |
|--------------------|-------------------|-------------------------------------------------------|----------------|-------|------------|-------|-----------|----|
| <b>K0479<br/>7</b> | pfdA, PFDN5       | prefoldin alpha subunit                               | -<br>2.83<br>8 | 4.490 | 18.4<br>53 | 0.000 | 0.0<br>03 | DN |
| <b>K0287<br/>7</b> | RP-L15e,<br>RPL15 | large subunit ribosomal protein L15e                  | -<br>2.82<br>6 | 4.669 | 14.5<br>08 | 0.000 | 0.0<br>06 | DN |
| <b>K0480<br/>2</b> | PCNA              | proliferating cell nuclear antigen                    | -<br>2.82<br>5 | 4.488 | 18.2<br>25 | 0.000 | 0.0<br>03 | DN |
| <b>K1966<br/>5</b> | pssA              | archaetidylserine synthase [EC:2.7.8.38]              | -<br>2.81<br>0 | 4.485 | 18.2<br>40 | 0.000 | 0.0<br>03 | DN |
| <b>K0005<br/>4</b> | mvaA              | hydroxymethylglutaryl-CoA reductase [EC:1.1.1.88]     | -<br>2.79<br>6 | 5.064 | 9.87<br>9  | 0.003 | 0.0<br>34 | DN |
| <b>K1410<br/>8</b> | ehaQ              | energy-converting hydrogenase A subunit Q             | -<br>2.79<br>5 | 4.483 | 18.2<br>93 | 0.000 | 0.0<br>03 | DN |
| <b>K2257<br/>9</b> | rph               | rifampicin phosphotransferase [EC:2.7.9.6]            | -<br>2.78<br>8 | 4.718 | 13.3<br>48 | 0.001 | 0.0<br>10 | DN |
| <b>K0897<br/>1</b> | K08971            | putative membrane protein                             | -<br>2.74<br>3 | 4.475 | 17.2<br>92 | 0.000 | 0.0<br>04 | DN |
| <b>K0105<br/>8</b> | pIdA              | phospholipase A1/A2 [EC:3.1.1.32 3.1.1.4]             | -<br>2.74<br>3 | 9.597 | 16.8<br>17 | 0.000 | 0.0<br>03 | DN |
| <b>K0710<br/>1</b> | K07101            | uncharacterized protein                               | -<br>2.70<br>9 | 5.021 | 9.83<br>0  | 0.003 | 0.0<br>34 | DN |
| <b>K1121<br/>2</b> | cofD              | LPPG:FO 2-phospho-L-lactate transferase [EC:2.7.8.28] | -<br>2.70<br>5 | 4.681 | 11.9<br>86 | 0.001 | 0.0<br>16 | DN |
| <b>K0977<br/>6</b> | K09776            | uncharacterized protein                               | -<br>2.69<br>7 | 4.468 | 17.0<br>95 | 0.000 | 0.0<br>04 | DN |

|               |            |                                                                                          |                |       |            |       |           |    |
|---------------|------------|------------------------------------------------------------------------------------------|----------------|-------|------------|-------|-----------|----|
| <b>K00579</b> | mtrC       | tetrahydromethanopterin S-methyltransferase subunit C [EC:2.1.1.86]                      | -<br>2.69<br>4 | 4.595 | 14.4<br>87 | 0.000 | 0.0<br>06 | DN |
| <b>K07463</b> | K07463     | archaea-specific RecJ-like exonuclease                                                   | -<br>2.67<br>7 | 4.539 | 17.2<br>36 | 0.000 | 0.0<br>03 | DN |
| <b>K18814</b> | ictB       | putative inorganic carbon (hco3(-)) transporter                                          | -<br>2.67<br>1 | 9.120 | 14.7<br>14 | 0.000 | 0.0<br>06 | DN |
| <b>K18320</b> | IS15, IS26 | transposase, IS6 family                                                                  | -<br>2.65<br>6 | 6.329 | 9.09<br>2  | 0.004 | 0.0<br>43 | DN |
| <b>K07700</b> | dpiB, citA | two-component system, CitB family, cit operon sensor histidine kinase CitA [EC:2.7.13.3] | -<br>2.64<br>0 | 5.191 | 9.17<br>4  | 0.004 | 0.0<br>42 | DN |
| <b>K07161</b> | K07161     | uncharacterized protein                                                                  | -<br>2.63<br>6 | 4.707 | 11.7<br>50 | 0.001 | 0.0<br>17 | DN |
| <b>K19003</b> | mgdA       | 1,2-diacylglycerol 3-beta-glucosyltransferase [EC:2.4.1.336]                             | -<br>2.62<br>1 | 5.599 | 9.30<br>5  | 0.003 | 0.0<br>41 | DN |
| <b>K07799</b> | mdtA       | membrane fusion protein, multidrug efflux system                                         | -<br>2.59<br>3 | 5.585 | 8.83<br>8  | 0.004 | 0.0<br>47 | DN |
| <b>K13275</b> | isp        | major intracellular serine protease [EC:3.4.21.-]                                        | -<br>2.57<br>3 | 4.453 | 17.2<br>92 | 0.000 | 0.0<br>04 | DN |
| <b>K07739</b> | ELP3, KAT9 | elongator complex protein 3 [EC:2.3.1.48]                                                | -<br>2.54<br>1 | 5.801 | 9.27<br>8  | 0.003 | 0.0<br>41 | DN |
| <b>K22227</b> | ahbD       | AdoMet-dependent heme synthase [EC:1.3.98.6]                                             | -<br>2.52<br>5 | 4.749 | 9.58<br>7  | 0.003 | 0.0<br>37 | DN |
| <b>K22397</b> | yjhH, yagE | 2-dehydro-3-deoxy-D-pentionate aldolase [EC:4.1.2.28]                                    | -<br>2.52<br>4 | 4.877 | 9.87<br>3  | 0.003 | 0.0<br>34 | DN |

|               |            |                                                                                                      |                |            |            |       |           |    |
|---------------|------------|------------------------------------------------------------------------------------------------------|----------------|------------|------------|-------|-----------|----|
| <b>K07467</b> | rstA1      | phage replication initiation protein                                                                 | -<br>2.48<br>8 | 11.14<br>1 | 22.9<br>80 | 0.000 | 0.0<br>02 | DN |
| <b>K00442</b> | frhD       | coenzyme F420 hydrogenase subunit delta                                                              | -<br>2.46<br>8 | 4.476      | 18.3<br>83 | 0.000 | 0.0<br>03 | DN |
| <b>K05937</b> | K05937     | uncharacterized protein                                                                              | -<br>2.41<br>8 | 4.432      | 16.1<br>35 | 0.000 | 0.0<br>05 | DN |
| <b>K09698</b> | gltX       | nondiscriminating glutamyl-tRNA synthetase [EC:6.1.1.24]                                             | -<br>2.36<br>2 | 5.971      | 8.42<br>9  | 0.005 | 0.0<br>56 | DN |
| <b>K03264</b> | EIF6       | translation initiation factor 6                                                                      | -<br>2.34<br>8 | 4.608      | 9.93<br>0  | 0.002 | 0.0<br>34 | DN |
| <b>K00320</b> | mer        | 5,10-methylenetetrahydromethanopterin reductase [EC:1.5.98.2]                                        | -<br>2.33<br>6 | 4.648      | 9.21<br>3  | 0.003 | 0.0<br>41 | DN |
| <b>K07115</b> | rlmJ       | 23S rRNA (adenine2030-N6)-methyltransferase [EC:2.1.1.266]                                           | -<br>2.23<br>2 | 8.588      | 13.0<br>91 | 0.001 | 0.0<br>11 | DN |
| <b>K02244</b> | comGB      | competence protein ComGB                                                                             | -<br>2.16<br>7 | 4.578      | 9.50<br>5  | 0.003 | 0.0<br>38 | DN |
| <b>K12234</b> | cofE, fbiB | coenzyme F420-0:L-glutamate ligase / coenzyme F420-1:gamma-L-glutamate ligase [EC:6.3.2.31 6.3.2.34] | -<br>2.12<br>3 | 4.534      | 9.27<br>0  | 0.003 | 0.0<br>41 | DN |
| <b>K00282</b> | gcvPA      | glycine dehydrogenase subunit 1 [EC:1.4.4.2]                                                         | -<br>1.81<br>7 | 7.858      | 8.54<br>0  | 0.005 | 0.0<br>53 | DN |
| <b>K08591</b> | plsY       | acyl phosphate:glycerol-3-phosphate acyltransferase [EC:2.3.1.275]                                   | -<br>1.58<br>9 | 11.84<br>8 | 17.7<br>41 | 0.000 | 0.0<br>03 | DN |
| <b>K02860</b> | rimM       | 16S rRNA processing protein RimM                                                                     | -<br>1.55<br>4 | 12.34<br>4 | 16.7<br>52 | 0.000 | 0.0<br>03 | DN |

|               |                     |                                                                                                  |                |            |            |       |           |    |
|---------------|---------------------|--------------------------------------------------------------------------------------------------|----------------|------------|------------|-------|-----------|----|
| <b>K02794</b> | manX                | mannose PTS system EIIAB component [EC:2.7.1.191]                                                | -<br>1.55<br>1 | 7.940      | 10.6<br>25 | 0.002 | 0.0<br>26 | DN |
| <b>K02227</b> | cbiB, cobD          | adenosylcobinamide-phosphate synthase [EC:6.3.1.10]                                              | -<br>1.54<br>6 | 10.82<br>4 | 20.1<br>97 | 0.000 | 0.0<br>02 | DN |
| <b>K03215</b> | rumA                | 23S rRNA (uracil1939-C5)-methyltransferase [EC:2.1.1.190]                                        | -<br>1.54<br>4 | 12.04<br>1 | 16.3<br>74 | 0.000 | 0.0<br>03 | DN |
| <b>K01704</b> | leuD, IPMI-S        | 3-isopropylmalate/(R)-2-methylmalate dehydratase small subunit [EC:4.2.1.33<br>4.2.1.35]         | -<br>1.54<br>1 | 11.58<br>9 | 16.4<br>09 | 0.000 | 0.0<br>03 | DN |
| <b>K03402</b> | argR, ahrC          | transcriptional regulator of arginine metabolism                                                 | -<br>1.44<br>1 | 11.78<br>1 | 15.3<br>13 | 0.000 | 0.0<br>05 | DN |
| <b>K00859</b> | coaE                | dephospho-CoA kinase [EC:2.7.1.24]                                                               | -<br>1.26<br>9 | 11.50<br>2 | 17.0<br>33 | 0.000 | 0.0<br>03 | DN |
| <b>K07566</b> | tsaC, rimN,<br>SUA5 | L-threonylcarbamoyladenylate synthase [EC:2.7.7.87]                                              | -<br>1.16<br>5 | 12.16<br>1 | 12.4<br>85 | 0.001 | 0.0<br>13 | DN |
| <b>K00873</b> | PK, pyk             | pyruvate kinase [EC:2.7.1.40]                                                                    | -<br>1.11<br>5 | 12.46<br>9 | 12.0<br>37 | 0.001 | 0.0<br>16 | DN |
| <b>K03702</b> | uvrB                | excinuclease ABC subunit B                                                                       | -<br>1.09<br>8 | 12.53<br>0 | 11.6<br>22 | 0.001 | 0.0<br>18 | DN |
| <b>K02224</b> | cobB-cbiA           | cobyrinic acid a,c-diamide synthase [EC:6.3.5.9 6.3.5.11]                                        | -<br>1.06<br>1 | 10.66<br>0 | 9.88<br>8  | 0.003 | 0.0<br>34 | DN |
| <b>K03615</b> | rnfC                | Na <sup>+</sup> -translocating ferredoxin:NAD <sup>+</sup> oxidoreductase subunit C [EC:7.2.1.2] | -<br>1.02<br>0 | 11.80<br>0 | 9.34<br>5  | 0.003 | 0.0<br>40 | DN |

List of KOs differentially represented in the gut microbiome from NW vs. OWOB populations. (LogFC >1 and <-1, P and FDR adjusted-P <0.05).

**Table S8:** Enriched pathways as determined by Fisher's test.

| <i>path</i>                                  | <i>allFreq</i> | <i>myFreq</i> | <i>pathInt</i> | <i>pathNoInt</i> | <i>backInt</i> | <i>backNoInt</i> | <i>pval</i> | <i>bonferroni</i> | <i>bh</i>  | <i>Representation NW vs OWOB</i> |
|----------------------------------------------|----------------|---------------|----------------|------------------|----------------|------------------|-------------|-------------------|------------|----------------------------------|
| <i>ABC transporters</i>                      | 83             | 3             | 3              | 80               | 74             | 2774             | 0.37327499  | 1                 | 0.46964551 | over                             |
| <i>Apoptosis</i>                             | 3              | 2             | 2              | 1                | 75             | 2853             | 0.00200939  | 0.0221033         | 0.00736777 | over                             |
| <i>Butanoate metabolism</i>                  | 24             | 2             | 2              | 22               | 75             | 2832             | 0.12979932  | 1                 | 0.27068601 | over                             |
| <i>Chromosome and associated proteins</i>    | 26             | 2             | 2              | 24               | 75             | 2830             | 0.14790293  | 1                 | 0.27068601 | over                             |
| <i>Enzymes with EC numbers</i>               | 122            | 4             | 4              | 118              | 73             | 2736             | 0.4000396   | 1                 | 0.46964551 | over                             |
| <i>Exosome</i>                               | 24             | 3             | 3              | 21               | 74             | 2833             | 0.0237308   | 0.26103878        | 0.06525969 | over                             |
| <i>Lysosome</i>                              | 9              | 3             | 3              | 6                | 74             | 2848             | 0.00130709  | 0.01437797        | 0.00718899 | over                             |
| <i>Membrane trafficking</i>                  | 8              | 3             | 3              | 5                | 74             | 2849             | 0.00088814  | 0.00976954        | 0.00718899 | over                             |
| <i>Peptidases</i>                            | 55             | 2             | 2              | 53               | 75             | 2801             | 0.42695046  | 1                 | 0.46964551 | over                             |
| <i>Transcription factors</i>                 | 83             | 4             | 4              | 79               | 73             | 2775             | 0.17225473  | 1                 | 0.27068601 | over                             |
| <i>Transporters</i>                          | 284            | 3             | 3              | 281              | 74             | 2573             | 0.98421195  | 1                 | 0.98421195 | over                             |
| <i>Chaperones and folding catalysts</i>      | 31             | 3             | 3              | 28               | 166            | 2734             | 0.26382009  | 1                 | 0.42320006 | under                            |
| <i>DNA repair and recombination proteins</i> | 46             | 2             | 2              | 44               | 167            | 2718             | 0.75407444  | 1                 | 0.86578918 | under                            |
| <i>DNA replication proteins</i>              | 15             | 3             | 3              | 12               | 166            | 2750             | 0.05133777  | 1                 | 0.18308884 | under                            |
| <i>Energy metabolism</i>                     | 18             | 7             | 7              | 11               | 162            | 2751             | 3.47E-05    | 0.00107624        | 0.00053812 | under                            |
| <i>Enzymes with EC numbers</i>               | 122            | 5             | 5              | 117              | 164            | 2645             | 0.84382502  | 1                 | 0.90201985 | under                            |
| <i>Ether lipid metabolism</i>                | 4              | 2             | 2              | 2                | 167            | 2760             | 0.01836051  | 0.56917579        | 0.11383516 | under                            |
| <i>Folate biosynthesis</i>                   | 15             | 2             | 2              | 13               | 167            | 2749             | 0.21290617  | 1                 | 0.41250571 | under                            |
| <i>Function unknown</i>                      | 98             | 7             | 7              | 91               | 162            | 2671             | 0.33489834  | 1                 | 0.45138472 | under                            |
| <i>Glycerolipid metabolism</i>               | 15             | 2             | 2              | 13               | 167            | 2749             | 0.21290617  | 1                 | 0.41250571 | under                            |
| <i>Glycerophospholipid metabolism</i>        | 15             | 4             | 4              | 11               | 165            | 2751             | 0.0088208   | 0.27344465        | 0.07847071 | under                            |
| <i>Glycolysis / Gluconeogenesis</i>          | 18             | 2             | 2              | 16               | 167            | 2746             | 0.27846123  | 1                 | 0.42320006 | under                            |

|                                                |     |    |    |     |     |      |            |            |            |       |
|------------------------------------------------|-----|----|----|-----|-----|------|------------|------------|------------|-------|
| <i>Glycosyltransferases</i>                    | 24  | 3  | 3  | 21  | 166 | 2741 | 0.15738499 | 1          | 0.34849533 | under |
| <i>Glyoxylate and dicarboxylate metabolism</i> | 19  | 2  | 2  | 17  | 167 | 2745 | 0.30033553 | 1          | 0.42320006 | under |
| <i>Lipid biosynthesis proteins</i>             | 17  | 2  | 2  | 15  | 167 | 2747 | 0.25654577 | 1          | 0.42320006 | under |
| <i>Lysine biosynthesis</i>                     | 10  | 2  | 2  | 8   | 167 | 2754 | 0.10969305 | 1          | 0.26157573 | under |
| <i>Methane metabolism</i>                      | 37  | 15 | 15 | 22  | 154 | 2740 | 4.33E-10   | 1.34E-08   | 1.34E-08   | under |
| <i>Nucleotide excision repair</i>              | 5   | 2  | 2  | 3   | 167 | 2759 | 0.02944864 | 0.91290799 | 0.15215133 | under |
| <i>Peptidases</i>                              | 55  | 3  | 3  | 52  | 166 | 2710 | 0.62370322 | 1          | 0.80561666 | under |
| <i>Porphyrin and chlorophyll metabolism</i>    | 31  | 3  | 3  | 28  | 166 | 2734 | 0.26382009 | 1          | 0.42320006 | under |
| <i>Prokaryotic defense system</i>              | 45  | 2  | 2  | 43  | 167 | 2719 | 0.74305535 | 1          | 0.86578918 | under |
| <i>Purine metabolism</i>                       | 33  | 3  | 3  | 30  | 166 | 2732 | 0.29590391 | 1          | 0.42320006 | under |
| <i>Pyruvate metabolism</i>                     | 29  | 4  | 4  | 25  | 165 | 2737 | 0.08221778 | 1          | 0.21239593 | under |
| <i>Replication and repair</i>                  | 13  | 3  | 3  | 10  | 166 | 2752 | 0.03510594 | 1          | 0.15546916 | under |
| <i>Ribosome</i>                                | 26  | 4  | 4  | 22  | 165 | 2740 | 0.05906092 | 1          | 0.18308884 | under |
| <i>Ribosome biogenesis</i>                     | 33  | 6  | 6  | 27  | 163 | 2735 | 0.01012525 | 0.31388286 | 0.07847071 | under |
| <i>Secretion system</i>                        | 75  | 3  | 3  | 72  | 166 | 2690 | 0.81781991 | 1          | 0.90201985 | under |
| <i>Terpenoid backbone biosynthesis</i>         | 8   | 2  | 2  | 6   | 167 | 2756 | 0.07357207 | 1          | 0.20733946 | under |
| <i>Transcription factors</i>                   | 83  | 4  | 4  | 79  | 165 | 2683 | 0.71554804 | 1          | 0.86578918 | under |
| <i>Transfer RNA biogenesis</i>                 | 37  | 5  | 5  | 32  | 164 | 2730 | 0.0586114  | 1          | 0.18308884 | under |
| <i>Transporters</i>                            | 284 | 7  | 7  | 277 | 162 | 2485 | 0.99825834 | 1          | 0.99825834 | under |
| <i>Two-component system</i>                    | 91  | 3  | 3  | 88  | 166 | 2674 | 0.90508105 | 1          | 0.93525042 | under |

Over-represented (over) and sub-represented (sub) KEGG pathways in the NW group compared to OWOB. *P-values* were adjusted by FDR according to Benjamini-Hochberg procedure.
